# Supplementary material for: Was the Last Bacterial Common Ancestor a Monoderm after All?
Source: MDPI journal article supplement (doi:10.3390/genes13020376), 2022-02-18
Supplement: s1 [file s1]

Supplementary Materials for

# Was the last bacterial common ancestor a monoderm after all?

**Raphaël R. Léonard**<sup>1,2</sup>, **Eric Sauvage**<sup>1</sup>, **Valérian Lupo**<sup>1,2</sup>, **Amandine Perrin**<sup>3,4</sup>, **Damien Sirjacobs**<sup>2</sup>, **Paulette Charlier**<sup>1</sup>, **Frédéric Kerff**<sup>1,\*</sup> and **Denis Baurain**<sup>2,\*</sup>

<sup>1</sup> InBioS–Centre d'Ingénierie des Protéines, Université de Liège, Liège 4000, Belgium;

<sup>2</sup> InBioS–PhytoSYSTEMS, Unit of Eukaryotic Phylogenomics, Université de Liège, 4000 Liège, Belgium

<sup>3</sup> University Lille, CNRS, Centrale Lille, UMR 9189 CRISTAL, F-59000 Lille, France

<sup>4</sup> Hub de Bioinformatique et Biostatistique-Département Biologie Computationnelle, Institut Pasteur, Paris 75015, France

Running Title: A monoderm ancestor for the bacterial domain

\* Correspondence: fkerff@uliege.be (F.K.); denis.baurain@uliege.be (D.B.)

**Table S1:** List of the 117 genes used for the phylogenomic tree of Figure S1. The genes are listed in their order of concatenation in the supermatrix. # species corresponds to the number of genomes (in the 101-species version ; see Figure S2) for which a given gene was present in the orthologous group (OG), and thus included here. # AA is the number of unambiguously aligned amino-acid positions used for each gene.

| OG           | # species | # AA | description                                |
|--------------|-----------|------|--------------------------------------------|
| MCLdcw110100 | 100       | 246  | L2                                         |
| MCLdcw110104 | 101       | 175  | S3                                         |
| MCLdcw110105 | 100       | 138  | S5                                         |
| MCLdcw110107 | 100       | 126  | L11                                        |
| MCLdcw110109 | 98        | 111  | hydrolase, TatD family                     |
| MCLdcw110112 | 99        | 109  | L14                                        |
| MCLdcw110114 | 100       | 76   | S19                                        |
| MCLdcw110116 | 101       | 451  | translation initiation factor IF-2         |
| MCLdcw110118 | 101       | 190  | metalloendopeptidase, glycoprotease family |
| MCLdcw110124 | 100       | 116  | S11                                        |
| MCLdcw110125 | 96        | 246  | cysteinyI-tRNA synthetase                  |
| MCLdcw110131 | 98        | 110  | dimethyladenosine transferase              |
| MCLdcw110132 | 100       | 200  | DNA polymerase III, subunits gamma and tau |
| MCLdcw110139 | 96        | 383  | GMP synthase                               |
| MCLdcw110140 | 97        | 124  | tRNA pseudouridine synthase B              |
| MCLdcw110159 | 98        | 124  | S4                                         |
| MCLdcw110162 | 98        | 109  | tRNA dimethylallyltransferase              |
| MCLdcw110169 | 94        | 292  | Methionine adenosyltransferase             |
| MCLdcw110172 | 98        | 372  | aspartyl-tRNA synthetase                   |
| MCLdcw110178 | 100       | 188  | DNA-directed RNA polymerase, alpha subunit |
| MCLdcw110179 | 98        | 446  | CTP synthase                               |
| MCLdcw110188 | 99        | 118  | S12                                        |
| MCLdcw110189 | 100       | 153  | L3                                         |
| MCLdcw110190 | 99        | 92   | L4/L1e                                     |
| MCLdcw110192 | 99        | 189  | S2                                         |

|              |     |     |                                      |
|--------------|-----|-----|--------------------------------------|
| MCLdcw110195 | 101 | 126 | L16                                  |
| MCLdcw110198 | 100 | 276 | UvrABC system protein C              |
| MCLdcw110199 | 100 | 245 | Peptide chain release factor 1       |
| MCLdcw110202 | 101 | 69  | L27                                  |
| MCLdcw110204 | 100 | 120 | L6                                   |
| MCLdcw110205 | 100 | 87  | L15                                  |
| MCLdcw110206 | 99  | 90  | L7/L12                               |
| MCLdcw110208 | 100 | 95  | S9                                   |
| MCLdcw110209 | 100 | 134 | S7                                   |
| MCLdcw110210 | 100 | 174 | L5                                   |
| MCLdcw110211 | 98  | 277 | GTP-binding protein EngA             |
| MCLdcw110214 | 100 | 155 | DNA primase                          |
| MCLdcw110216 | 101 | 185 | MraW                                 |
| MCLdcw110217 | 100 | 108 | L13                                  |
| MCLdcw110218 | 100 | 79  | L21                                  |
| MCLdcw110219 | 101 | 265 | GTP-binding protein Obg/CgtA         |
| MCLdcw110222 | 100 | 564 | Excinuclease ABC subunit B           |
| MCLdcw110224 | 101 | 154 | Ribosome-recycling factor            |
| MCLdcw110225 | 100 | 95  | S8                                   |
| MCLdcw110226 | 101 | 116 | S13                                  |
| MCLdcw110228 | 97  | 129 | Translation initiation factor IF-3   |
| MCLdcw110230 | 100 | 85  | L22                                  |
| MCLdcw110233 | 100 | 128 | SsrA-binding protein                 |
| MCLdcw110235 | 101 | 200 | transcription elongation factor NusA |
| MCLdcw110239 | 101 | 112 | L20                                  |
| MCLdcw110242 | 100 | 194 | L1                                   |
| MCLdcw110243 | 100 | 161 | tRNA-(guanine-N1)-methyltransferase  |
| MCLdcw110244 | 99  | 79  | S15                                  |
| MCLdcw110246 | 100 | 40  | L24                                  |
| MCLdcw110247 | 100 | 90  | L18                                  |
| MCLdcw110248 | 101 | 258 | preprotein translocase, SecY subunit |

|              |     |     |                                                                        |
|--------------|-----|-----|------------------------------------------------------------------------|
| MCLdcw110249 | 98  | 76  | L17                                                                    |
| MCLdcw110253 | 93  | 234 | UDP-N-acetylmuramoyl-L-alanyl-D-glutamate--2, 6-diaminopimelate ligase |
| MCLdcw110255 | 100 | 84  | L19                                                                    |
| MCLdcw110257 | 100 | 105 | NusG antitermination factor                                            |
| MCLdcw110258 | 100 | 232 | Phenylalanyl-tRNA synthetase alpha chain                               |
| MCLdcw110259 | 101 | 60  | S16                                                                    |
| MCLdcw110260 | 100 | 97  | S10                                                                    |
| MCLdcw110265 | 98  | 91  | L9                                                                     |
| MCLdcw110269 | 93  | 229 | Chorismate synthase                                                    |
| MCLdcw110270 | 100 | 73  | S17                                                                    |
| MCLdcw110272 | 98  | 183 | Methionyl-tRNA formyltransferase                                       |
| MCLdcw110273 | 101 | 183 | uridylate kinase                                                       |
| MCLdcw110277 | 99  | 296 | Holliday junction ATP-dependent DNA helicase ruvB                      |
| MCLdcw110287 | 98  | 323 | lysyl-tRNA synthetase (class II)                                       |
| MCLdcw110294 | 100 | 130 | Guanylate kinase                                                       |
| MCLdcw110295 | 95  | 129 | Phospho-N-acetylmuramoyl-pentapeptide-transferase                      |
| MCLdcw110297 | 100 | 129 | riboflavin biosynthesis protein RibF                                   |
| MCLdcw110298 | 87  | 85  | tRNA threonylcarbamoyladenosine biosynthesis protein RimN              |
| MCLdcw110306 | 99  | 304 | Phenylalanyl-tRNA synthetase beta chain                                |
| MCLdcw110309 | 92  | 100 | N-acetylglucosamine transferase                                        |
| MCLdcw110313 | 96  | 108 | pantetheine-phosphate adenylyltransferase                              |
| MCLdcw110314 | 96  | 170 | glycerol-3-phosphate dehydrogenase                                     |
| MCLdcw110317 | 92  | 56  | L25/L23                                                                |
| MCLdcw110318 | 99  | 494 | Polyribonucleotide nucleotidyltransferase                              |
| MCLdcw110321 | 95  | 134 | Recombination protein recR                                             |
| MCLdcw110327 | 93  | 56  | L35                                                                    |
| MCLdcw110332 | 92  | 238 | Peptide chain release factor 2                                         |
| MCLdcw110342 | 93  | 73  | Holliday junction ATP-dependent DNA helicase ruvA                      |
| MCLdcw110345 | 87  | 29  | S6                                                                     |
| MCLdcw110349 | 94  | 502 | transcription-repair coupling factor                                   |



|              |    |     |                                                         |
|--------------|----|-----|---------------------------------------------------------|
| MCLdcw110352 | 98 | 136 | oxygen-independent coproporphyrinogen III oxidase       |
| MCLdcw110353 | 91 | 134 | DNA protecting protein DprA                             |
| MCLdcw110358 | 96 | 34  | Uncharacterized protein family UPF0079, ATPase          |
| MCLdcw110365 | 91 | 67  | tRNA(Ile)-lysine synthase                               |
| MCLdcw110373 | 87 | 338 | ATP-dependent DNA helicase RecG                         |
| MCLdcw110380 | 90 | 126 | pyrroline-5-carboxylate reductase                       |
| MCLdcw110383 | 92 | 213 | DNA repair protein RecN                                 |
| MCLdcw110388 | 92 | 52  | Dephospho-CoA kinase                                    |
| MCLdcw110394 | 90 | 116 | 6,7-dimethyl-8-ribityllumazine synthase                 |
| MCLdcw110405 | 97 | 370 | Glutamyl-tRNA(Gln) amidotransferase subunit A           |
| MCLdcw110408 | 93 | 48  | iojap-like protein                                      |
| MCLdcw110409 | 93 | 254 | primosomal protein NŦÇÖ                                 |
| MCLdcw110416 | 98 | 321 | tRNA(Asn/Gln) amidotransferase subunit B                |
| MCLdcw110420 | 98 | 73  | L10                                                     |
| MCLdcw110425 | 93 | 66  | nicotinate-nucleotide adenylyltransferase               |
| MCLdcw110435 | 88 | 297 | Argininosuccinate synthase                              |
| MCLdcw110444 | 90 | 136 | Cytidylate kinase                                       |
| MCLdcw110449 | 89 | 30  | trigger factor                                          |
| MCLdcw110457 | 91 | 105 | Riboflavin synthase alpha chain                         |
| MCLdcw110466 | 89 | 222 | S-adenosylmethionine: tRNA ribosyltransferase-isomerase |
| MCLdcw110494 | 88 | 79  | 4-diphosphocytidyl-2-C-methyl-D-erythritol kinase       |
| MCLdcw110495 | 88 | 221 | Imidazole glycerol phosphate synthase subunit hisF      |
| MCLdcw110507 | 88 | 292 | Porphobilinogen synthase                                |
| MCLdcw110513 | 89 | 338 | chromosome segregation protein SMC                      |
| MCLdcw110524 | 87 | 96  | Septum formation protein Maf                            |
| MCLdcw110525 | 90 | 72  | crossover junction endodeoxyribonuclease RuvC           |
| MCLdcw110556 | 93 | 224 | 1-deoxy-D-xylulose 5-phosphate reductoisomerase         |
| MCLdcw110559 | 90 | 119 | 2C-methyl-D-erythritol 2,4-cyclodiphosphate synthase    |
| MCLdcw110595 | 90 | 62  | UPF0133 protein ybaB                                    |
| MCLdcw110608 | 89 | 347 | glutamate-1-semialdehyde-2,1-aminomutase                |
| MCLdcw110617 | 92 | 194 | fatty acid/phospholipid synthesis protein PlsX          |

**Table S2:** List of references used to determine the cell-wall architecture for the 85 representative organisms of Figure S1. To be used with Table S3.

|    |                                                                                                                                                                                                                                                                                                                          |
|----|--------------------------------------------------------------------------------------------------------------------------------------------------------------------------------------------------------------------------------------------------------------------------------------------------------------------------|
| 1  | Anderson, Iain, et al. "Genome sequence of the homoacetogenic bacterium <i>Holophaga foetida</i> type strain (TMBS4 T)." <i>Standards in genomic sciences</i> 6.2 (2012): 174-184.                                                                                                                                       |
| 2  | Liesack, Werner, et al. " <i>Holophaga foetida</i> gen. nov., sp. nov., a new, homoacetogenic bacterium degrading methoxylated aromatic compounds." <i>Archives of Microbiology</i> 162.1 (1994): 85-90.                                                                                                                 |
| 3  | Pankratov, Timofei A., et al. "Substrate-induced growth and isolation of <i>Acidobacteria</i> from acidic Sphagnum peat." <i>The ISME Journal</i> 2.5 (2008): 551-560.                                                                                                                                                   |
| 4  | Kishimoto, Noriaki, Yoshimasa Kosako, and Tatsuo Tano. " <i>Acidobacterium capsulatum</i> gen. nov., sp. nov.: an acidophilic chemoorganotrophic bacterium containing menaquinone from acidic mineral environment." <i>Current Microbiology</i> 22.1 (1991): 1-7.                                                        |
| 5  | Carreto, Laura, et al. " <i>Rubrobacter xylanophilus</i> sp. nov., a new thermophilic species isolated from a thermally polluted effluent." <i>International Journal of Systematic and Evolutionary Microbiology</i> 46.2 (1996): 460-465.                                                                               |
| 6  | Albuquerque, L., and M. S. da Costa. "The Family <i>Rubrobacteraceae</i> ." <i>The Prokaryotes</i> (2014): 861-866.                                                                                                                                                                                                      |
| 7  | Del Sol, Ricardo, et al. "Characterization of changes to the cell surface during the life cycle of <i>Streptomyces coelicolor</i> : atomic force microscopy of living cells." <i>Journal of bacteriology</i> 189.6 (2007): 2219-2225.                                                                                    |
| 8  | Bentley, S. D., et al. "SCP1, a 356 023 bp linear plasmid adapted to the ecology and developmental biology of its host, <i>Streptomyces coelicolor</i> A3 (2)." <i>Molecular microbiology</i> 51.6 (2004): 1615-1628.                                                                                                    |
| 9  | Mohagheghi, A., et al. "Isolation and characterization of <i>Acidothermus cellulolyticus</i> gen. nov., sp. nov., a new genus of thermophilic, acidophilic, cellulolytic bacteria." <i>International Journal of Systematic and Evolutionary Microbiology</i> 36.3 (1986): 435-443.                                       |
| 10 | Brüggemann, Holger, et al. "The complete genome sequence of <i>Propionibacterium acnes</i> , a commensal of human skin." <i>Science</i> 305.5684 (2004): 671-673.                                                                                                                                                        |
| 11 | Koskinen, Patrik, et al. "Complete genome sequence of <i>Propionibacterium freudenreichii</i> DSM 20271 T." <i>Standards in genomic sciences</i> 10.1 (2015): 1-6.                                                                                                                                                       |
| 12 | Del Rio, Tijana Glavina, et al. "Complete genome sequence of <i>Chitinophaga pinensis</i> type strain (UQM 2034 T)." <i>Standards in genomic sciences</i> 2.1 (2010): 87-95.                                                                                                                                             |
| 13 | Alfredsson, Gudni A., et al. " <i>Rhodothermus marinus</i> , gen. nov., sp. nov., a thermophilic, halophilic bacterium from submarine hot springs in Iceland." <i>Microbiology</i> 134.2 (1988): 299-306.                                                                                                                |
| 14 | Sharma, Shalley, et al. " <i>Fulvivirga imtechensis</i> sp. nov., a member of the phylum <i>Bacteroidetes</i> ." <i>International journal of systematic and evolutionary microbiology</i> 62.Pt_9 (2012): 2213-2217.                                                                                                     |
| 15 | Ueki, Atsuko, et al. " <i>Paludibacter propionigenes</i> gen. nov., sp. nov., a novel strictly anaerobic, Gram-negative, propionate-producing bacterium isolated from plant residue in irrigated rice-field soil in Japan." <i>International journal of systematic and evolutionary microbiology</i> 56.1 (2006): 39-44. |

|    |                                                                                                                                                                                                                                                                                                                                                                                                                                                          |
|----|----------------------------------------------------------------------------------------------------------------------------------------------------------------------------------------------------------------------------------------------------------------------------------------------------------------------------------------------------------------------------------------------------------------------------------------------------------|
| 16 | Mori, Koji, et al. "Caldisericum exile gen. nov., sp. nov., an anaerobic, thermophilic, filamentous bacterium of a novel bacterial phylum, Caldiserica phyl. nov., originally called the candidate phylum OP5, and description of Caldiseriaceae fam. nov., Caldisericales ord. nov. and Caldisericia classis nov." International journal of systematic and evolutionary microbiology 59.11 (2009): 2894-2898.                                           |
| 17 | Matsumoto, Akira. "Structural characteristics of chlamydial bodies." Microbiology of chlamydia (1988): 21-45.                                                                                                                                                                                                                                                                                                                                            |
| 18 | Frohlich, Kyla M., et al. "Membrane vesicle production by Chlamydia trachomatis as an adaptive response." Frontiers in cellular and infection microbiology 4 (2014): 73.                                                                                                                                                                                                                                                                                 |
| 19 | Everett, Karin DE, Robin M. Bush, and Arthur A. Andersen. "Emended description of the order Chlamydiales, proposal of Parachlamydiaceae fam. nov. and Simkaniaceae fam. nov., each containing one monotypic genus, revised taxonomy of the family Chlamydiaceae, including a new genus and five new species, and standards for the identification of organisms." International Journal of Systematic and Evolutionary Microbiology 49.2 (1999): 415-440. |
| 20 | Van Teeseling, Muriel CF, et al. "Anammox Planctomycetes have a peptidoglycan cell wall." Nature communications 6.1 (2015): 1-6.                                                                                                                                                                                                                                                                                                                         |
| 21 | Greub, G. "Parachlamydia acanthamoebae, an emerging agent of pneumonia." Clinical Microbiology and Infection 15.1 (2009): 18-28.                                                                                                                                                                                                                                                                                                                         |
| 22 | Michel, Rolf, et al. "Acanthamoeba from human nasal mucosa infected with an obligate intracellular parasite." European journal of protistology 30.1 (1994): 104-110.                                                                                                                                                                                                                                                                                     |
| 23 | Amann, Rudolf, et al. "Obligate intracellular bacterial parasites of acanthamoebae related to Chlamydia spp." Applied and environmental microbiology 63.1 (1997): 115-121.                                                                                                                                                                                                                                                                               |
| 24 | Jacquier, Nicolas, et al. "Cell wall precursors are required to organize the chlamydial division septum." Nature communications 5.1 (2014): 1-11.                                                                                                                                                                                                                                                                                                        |
| 25 | Everett, K. D., and Thomas P. Hatch. "Architecture of the cell envelope of Chlamydia psittaci 6BC." Journal of Bacteriology 177.4 (1995): 877-882.                                                                                                                                                                                                                                                                                                       |
| 26 | Larsen, Helge. "On the culture and general physiology of the green sulfur bacteria." Journal of Bacteriology 64.2 (1952): 187-196.                                                                                                                                                                                                                                                                                                                       |
| 27 | Gibson, Jane, Norbert Pfennig, and John B. Waterbury. "Chloroherpeton thalassium gen. nov. et spec. nov., a non-filamentous, flexing and gliding green sulfur bacterium." Archives of microbiology 138.2 (1984): 96-101.                                                                                                                                                                                                                                 |
| 28 | Pfennig, N. "Chlorobium phaeobacteroides nov. spec. and C. phaeovibrioides nov. spec., two new species of green sulfur bacteria." Archiv fur Mikrobiologie 63.3 (1968): 224-226.                                                                                                                                                                                                                                                                         |
| 29 | Vogl, Kajetan, et al. "Chlorobium chlorochromatii sp. nov., a symbiotic green sulfur bacterium isolated from the phototrophic consortium "Chlorochromatium aggregatum"." Archives of microbiology 185.5 (2006): 363-372.                                                                                                                                                                                                                                 |
| 30 | Reichenbach, Hans, and Jochen R. Golecki. "The fine structure of Herpetosiphon, and a note on the taxonomy of the genus." Archives of microbiology 102.1 (1975): 281-291.                                                                                                                                                                                                                                                                                |
| 31 | Holt, J. G., and R. A. Lewin. "Herpetosiphon aurantiacus gen. et sp. n., a new filamentous gliding organism." Journal of bacteriology 95.6 (1968): 2407-2408.                                                                                                                                                                                                                                                                                            |
| 32 | Sekiguchi, Yuji, et al. "Anaerolinea thermophila gen. nov., sp. nov. and Caldilinea aerophila gen. nov., sp. nov., novel filamentous thermophiles that represent a previously uncultured lineage of the domain Bacteria at the subphylum level." International journal of systematic and evolutionary microbiology 53.6 (2003): 1843-1851.                                                                                                               |

|    |                                                                                                                                                                                                                                                                                                                         |
|----|-------------------------------------------------------------------------------------------------------------------------------------------------------------------------------------------------------------------------------------------------------------------------------------------------------------------------|
| 33 | Chang, Yun-Juan, et al. "Non-contiguous finished genome sequence and contextual data of the filamentous soil bacterium Ktedonobacter racemifer type strain (SOSP1-21 T)." <i>Standards in genomic sciences</i> 5.1 (2011): 97-111.                                                                                      |
| 34 | Cavaletti, Linda, et al. "New lineage of filamentous, spore-forming, gram-positive bacteria from soil." <i>Applied and Environmental Microbiology</i> 72.6 (2006): 4360-4369.                                                                                                                                           |
| 35 | Wu, Dongying, et al. "Complete genome sequence of the aerobic CO-oxidizing thermophile <i>Thermomicrobium roseum</i> ." <i>PLoS One</i> 4.1 (2009): e4207.                                                                                                                                                              |
| 36 | Merkel, G. J., D. R. Durham, and J. J. Perry. "The atypical cell wall composition of <i>Thermomicrobium roseum</i> ." <i>Canadian journal of microbiology</i> 26.4 (1980): 556-559.                                                                                                                                     |
| 37 | Rauschenbach, Ines, Priya Narasingarao, and Max M. Häggblom. " <i>Desulfurispirillum indicum</i> sp. nov., a selenate- and selenite-respiring bacterium isolated from an estuarine canal." <i>International journal of systematic and evolutionary microbiology</i> 61.3 (2011): 654-658.                               |
| 38 | Hoiczky, Egbert, and Alfred Hansel. "Cyanobacterial cell walls: news from an unusual prokaryotic envelope." <i>Journal of bacteriology</i> 182.5 (2000): 1191-1199.                                                                                                                                                     |
| 39 | Schneider, Sabine, and Uwe J. Jürgens. "Cell wall and sheath constituents of the cyanobacterium <i>Gloeobacter violaceus</i> ." <i>Archives of microbiology</i> 156.4 (1991): 312-318.                                                                                                                                  |
| 40 | Myhr, Siri, and Terje Torsvik. " <i>Denitrovibrio acetiphilus</i> , a novel genus and species of dissimilatory nitrate-reducing bacterium isolated from an oil reservoir model column." <i>International journal of systematic and evolutionary microbiology</i> 50.4 (2000): 1611-1619.                                |
| 41 | Takai, Ken, et al. " <i>Deferribacter desulfuricans</i> sp. nov., a novel sulfur-, nitrate- and arsenate-reducing thermophile isolated from a deep-sea hydrothermal vent." <i>International journal of systematic and evolutionary microbiology</i> 53.3 (2003): 839-846.                                               |
| 42 | Iino, Takao, et al. " <i>Calditerrivibrio nitroreducens</i> gen. nov., sp. nov., a thermophilic, nitrate-reducing bacterium isolated from a terrestrial hot spring in Japan." <i>International journal of systematic and evolutionary microbiology</i> 58.7 (2008): 1675-1679.                                          |
| 43 | Fiala, Gerhard, et al. " <i>Flexistipes sinuarabici</i> , a novel genus and species of eubacteria occurring in the Atlantis II Deep brines of the Red Sea." <i>Archives of Microbiology</i> 154.2 (1990): 120-126.                                                                                                      |
| 44 | Miroshnichenko, M. L., et al. " <i>Oceanithermus profundus</i> gen. nov., sp. nov., a thermophilic, microaerophilic, facultatively chemolithoheterotrophic bacterium from a deep-sea hydrothermal vent." <i>International journal of systematic and evolutionary microbiology</i> 53.3 (2003): 747-752.                 |
| 45 | Sako, Yoshihiko, et al. " <i>Marinithermus hydrothermalis</i> gen. nov., sp. nov., a strictly aerobic, thermophilic bacterium from a deep-sea hydrothermal vent chimney." <i>International Journal of Systematic and Evolutionary Microbiology</i> 53.1 (2003): 59-65.                                                  |
| 46 | Henne, Anke, et al. "The genome sequence of the extreme thermophile <i>Thermus thermophilus</i> ." <i>Nature biotechnology</i> 22.5 (2004): 547-553.                                                                                                                                                                    |
| 47 | Brooks, B. W., and R. G. E. Murray. "Nomenclature for " <i>Micrococcus radiodurans</i> " and other radiation-resistant cocci: <i>Deinococcaceae</i> fam. nov. and <i>Deinococcus</i> gen. nov., including five species." <i>International Journal of Systematic and Evolutionary Microbiology</i> 31.3 (1981): 353-360. |
| 48 | Geissinger, Oliver, et al. "The ultramicrobacterium " <i>Elusimicrobium minutum</i> " gen. nov., sp. nov., the first cultivated representative of the termite group 1 phylum." <i>Applied and environmental microbiology</i> 75.9 (2009): 2831-2840.                                                                    |
| 49 | Jun, H. S., et al. " <i>Fibrobacter succinogenes</i> , a dominant fibrolytic ruminal bacterium: transition to the post genomic era." <i>Asian-Australasian Journal of Animal Sciences</i> 20.5 (2007): 802-810.                                                                                                         |
| 50 | Driks, A. "Overview: development in bacteria: spore formation in <i>Bacillus subtilis</i> ." <i>Cellular and</i>                                                                                                                                                                                                        |

|    |                                                                                                                                                                                                                                                                                                                                           |
|----|-------------------------------------------------------------------------------------------------------------------------------------------------------------------------------------------------------------------------------------------------------------------------------------------------------------------------------------------|
|    | Molecular Life Sciences CMLS 59.3 (2002): 389-391.                                                                                                                                                                                                                                                                                        |
| 51 | Sekiguchi, Junichi, and Hiroki Yamamoto. "Cell wall structure of E. coli and B. subtilis, p 115–148." <i>Escherichia coli and Bacillus subtilis: the frontiers of molecular microbiology revisited</i> . Research Signpost, Kerala, India (2012).                                                                                         |
| 52 | Kay, D., and S. C. Warren. "Sporulation in <i>Bacillus subtilis</i> . Morphological changes." <i>Biochemical Journal</i> 109.5 (1968): 819-824.                                                                                                                                                                                           |
| 53 | Tocheva, Elitza I., et al. "Peptidoglycan transformations during <i>Bacillus subtilis</i> sporulation." <i>Molecular microbiology</i> 88.4 (2013): 673-686.                                                                                                                                                                               |
| 54 | Parshina, Sofiya N., et al. "Desulfotomaculum carboxydivorans sp. nov., a novel sulfate-reducing bacterium capable of growth at 100% CO <sub>2</sub> ." <i>International Journal of Systematic and Evolutionary Microbiology</i> 55.5 (2005): 2159-2165.                                                                                  |
| 55 | Campbell, L. LEON, and JOHN R. Postgate. "Classification of the spore-forming sulfate-reducing bacteria." <i>Bacteriological reviews</i> 29.3 (1965): 359-363.                                                                                                                                                                            |
| 56 | He, Zengguo, et al. "Isolation and identification of a <i>Paenibacillus polymyxa</i> strain that coproduces a novel lantibiotic and polymyxin." <i>Applied and Environmental Microbiology</i> 73.1 (2007): 168-178.                                                                                                                       |
| 57 | Shelobolina, Evgenya S., et al. "Geobacter pickeringii sp. nov., <i>Geobacter argillaceus</i> sp. nov. and <i>Pelosinus fermentans</i> gen. nov., sp. nov., isolated from subsurface kaolin lenses." <i>International Journal of Systematic and Evolutionary Microbiology</i> 57.1 (2007): 126-135.                                       |
| 58 | Tang, Kuo-Hsiang, Hai Yue, and Robert E. Blankenship. "Energy metabolism of <i>Heliobacterium modesticaldum</i> during phototrophic and chemotrophic growth." <i>BMC microbiology</i> 10.1 (2010): 1-14.                                                                                                                                  |
| 59 | Sikorski, Johannes, et al. "Complete genome sequence of <i>Acetohalobium arabaticum</i> type strain (Z-7288 T)." <i>Standards in genomic sciences</i> 3.1 (2010): 57-65.                                                                                                                                                                  |
| 60 | Tocheva, Elitza I., et al. "Peptidoglycan remodeling and conversion of an inner membrane into an outer membrane during sporulation." <i>Cell</i> 146.5 (2011): 799-812.                                                                                                                                                                   |
| 61 | Mori, Koji, et al. "A novel lineage of sulfate-reducing microorganisms: <i>Thermodesulfobiaceae</i> fam. nov., <i>Thermodesulfobium narugense</i> , gen. nov., sp. nov., a new thermophilic isolate from a hot spring." <i>Extremophiles</i> 7.4 (2003): 283-290.                                                                         |
| 62 | MURRAY, WILLIAM D., and A. W. Khan. " <i>Clostridium saccharolyticum</i> sp. nov., a saccharolytic species from sewage sludge." <i>International Journal of Systematic and Evolutionary Microbiology</i> 32.1 (1982): 132-135.                                                                                                            |
| 63 | Van Gylswyk, N. O., E. JANE MORRIS, and H. J. Els. "Sporulation and cell wall structure of <i>Clostridium polysaccharolyticum</i> comb. nov.(formerly <i>Fusobacterium polysaccharolyticum</i> )." <i>Microbiology</i> 121.2 (1980): 491-493.                                                                                             |
| 64 | Umeda, Akiko, Y. U. J. I. Ueki, and K. A. Z. U. N. O. B. U. Amako. "Structure of the <i>Staphylococcus aureus</i> cell wall determined by the freeze-substitution method." <i>Journal of bacteriology</i> 169.6 (1987): 2482-2487.                                                                                                        |
| 65 | Kosowska, Klaudia, et al. "The <i>Clostridium ramosum</i> IgA proteinase represents a novel type of metalloendopeptidase." <i>Journal of Biological Chemistry</i> 277.14 (2002): 11987-11994.                                                                                                                                             |
| 66 | Zhang, Hui, et al. " <i>Gemmatimonas aurantiaca</i> gen. nov., sp. nov., a Gram-negative, aerobic, polyphosphate-accumulating micro-organism, the first cultured representative of the new bacterial phylum Gemmatimonadetes phyl. nov." <i>International journal of systematic and evolutionary microbiology</i> 53.4 (2003): 1155-1163. |

|    |                                                                                                                                                                                                                                                                                                                                                                                                         |
|----|---------------------------------------------------------------------------------------------------------------------------------------------------------------------------------------------------------------------------------------------------------------------------------------------------------------------------------------------------------------------------------------------------------|
| 67 | Kadnikov, Vitaly V., et al. "Characterization of <i>Melioribacter roseus</i> gen. nov., sp. nov., a novel facultatively anaerobic thermophilic cellulolytic bacterium from the class Ignavibacteria, and a proposal of a novel bacterial phylum Ignavibacteriae." (2013).                                                                                                                               |
| 68 | Iino, Takao, et al. "Ignavibacterium album gen. nov., sp. nov., a moderately thermophilic anaerobic bacterium isolated from microbial mats at a terrestrial hot spring and proposal of Ignavibacteria classis nov., for a novel lineage at the periphery of green sulfur bacteria." International journal of systematic and evolutionary microbiology 60.6 (2010): 1376-1382.                           |
| 69 | Cho, Jang-Cheon, et al. "Lentisphaera araneosa gen. nov., sp. nov., a transparent exopolymer producing marine bacterium, and the description of a novel bacterial phylum, Lentisphaerae." Environmental Microbiology 66 (2004): 611-621.                                                                                                                                                                |
| 70 | Henry, E. A., et al. "Characterization of a new thermophilic sulfate-reducing bacterium." Archives of Microbiology 161.1 (1994): 62-69.                                                                                                                                                                                                                                                                 |
| 71 | Hippe, Hans. "Leptospirillum gen. nov.(ex Markosyan 1972), nom. rev., including Leptospirillum ferrooxidans sp. nov.(ex Markosyan 1972), nom. rev. and Leptospirillum thermoferrooxidans sp. nov.(Golovacheva et al. 1992)." International journal of systematic and evolutionary microbiology 50.2 (2000): 501-503.                                                                                    |
| 72 | Van Teeseling, Muriel CF, et al. "Anammox Planctomycetes have a peptidoglycan cell wall." Nature communications 6.1 (2015): 1-6.                                                                                                                                                                                                                                                                        |
| 73 | Nevin, Kelly P., et al. "Geobacter bemidjiensis sp. nov. and Geobacter psychrophilus sp. nov., two novel Fe (III)-reducing subsurface isolates." International Journal of Systematic and Evolutionary Microbiology 55.4 (2005): 1667-1674.                                                                                                                                                              |
| 74 | Bazylnski, Dennis A., et al. "Magnetococcus marinus gen. nov., sp. nov., a marine, magnetotactic bacterium that represents a novel lineage (Magnetococcaceae fam. nov., Magnetococcales ord. nov.) at the base of the Alphaproteobacteria." International journal of systematic and evolutionary microbiology 63.Pt_3 (2013): 801-808.                                                                  |
| 75 | Bryantseva, Irina, et al. "Thiorhodospira sibirica gen. nov., sp. nov., a new alkaliphilic purple sulfur bacterium from a Siberian soda lake." International Journal of Systematic and Evolutionary Microbiology 49.2 (1999): 697-703.                                                                                                                                                                  |
| 76 | Matias, Valério RF, et al. "Cryo-transmission electron microscopy of frozen-hydrated sections of Escherichia coli and Pseudomonas aeruginosa." Journal of bacteriology 185.20 (2003): 6112-6118.                                                                                                                                                                                                        |
| 77 | Keck, Matthias, et al. "Unusual outer membrane lipid composition of the gram-negative, lipopolysaccharide-lacking myxobacterium Sorangium cellulosum So ce56." Journal of Biological Chemistry 286.15 (2011): 12850-12859.                                                                                                                                                                              |
| 78 | Koops, H. P., and G. Stehr. "Classification of eight new species of ammonia-oxidizing bacteria: Nitrosomonas communis sp. nov., Nitrosomonas ureae sp. nov., Nitrosomonas aestuarii sp. nov., Nitrosomonas marina sp. nov., Nitrosomonas nitrosa sp. nov., Nitrosomonas eutropha sp. nov., Nitrosomonas oligotropha sp. nov. and Nitrosomonas halophila sp. nov." Microbiology 137.7 (1991): 1689-1699. |
| 79 | Pati, Amrita, et al. "Complete genome sequence of Arcobacter nitrofigilis type strain (CI T)." Standards in Genomic Sciences 2.3 (2010): 300-308.                                                                                                                                                                                                                                                       |
| 80 | Curtis, Patrick D., and Yves V. Brun. "Getting in the loop: regulation of development in Caulobacter crescentus." Microbiology and Molecular Biology Reviews 74.1 (2010): 13-41.                                                                                                                                                                                                                        |
| 81 | Hill, Darryl J., et al. "Cellular and molecular biology of Neisseria meningitidis colonization and invasive disease." Clinical science 118.9 (2010): 547-564.                                                                                                                                                                                                                                           |
| 82 | Mobley, Harry LT, George L. Mendz, and Stuart L. Hazell. "Helicobacter pylori: physiology and                                                                                                                                                                                                                                                                                                           |

|    |                                                                                                                                                                                                                                                                                                                                |
|----|--------------------------------------------------------------------------------------------------------------------------------------------------------------------------------------------------------------------------------------------------------------------------------------------------------------------------------|
|    | genetics." (2001).                                                                                                                                                                                                                                                                                                             |
| 83 | Huntemann, Marcel, et al. "Genome sequence of the phylogenetically isolated spirochete <i>Leptonema illini</i> type strain (3055 T)." <i>Standards in genomic sciences</i> 8.2 (2013): 177-187.                                                                                                                                |
| 84 | Johnson, Russell C. "Leptospira." <i>Medical Microbiology</i> , edited by Samuel Baron, 4th ed., University of Texas Medical Branch at Galveston, 1996.                                                                                                                                                                        |
| 85 | Stackebrandt, Erko, et al. "Genome sequence of the free-living aerobic spirochete <i>Turneriella parva</i> type strain (HT), and emendation of the species <i>Turneriella parva</i> ." <i>Standards in genomic sciences</i> 8.2 (2013): 228-238.                                                                               |
| 86 | Evangelista, Karen V., and Jenifer Coburn. "Leptospira as an emerging pathogen: a review of its biology, pathogenesis and host immune responses." <i>Future microbiology</i> 5.9 (2010): 1413-1425.                                                                                                                            |
| 87 | Razin, Shmuel. "Isolation and characterization of mycoplasma membranes." <i>The mycoplasmas</i> 1 (1979): 213-229.                                                                                                                                                                                                             |
| 88 | Moussard, H., et al. "Thermodesulfatator indicus gen. nov., sp. nov., a novel thermophilic chemolithoautotrophic sulfate-reducing bacterium isolated from the Central Indian Ridge." <i>International Journal of Systematic and Evolutionary Microbiology</i> 54.1 (2004): 227-233.                                            |
| 89 | Hamilton-Brehm, Scott D., et al. "Thermodesulfobacterium geofontis sp. nov., a hyperthermophilic, sulfate-reducing bacterium isolated from Obsidian Pool, Yellowstone National Park." <i>Extremophiles</i> 17.2 (2013): 251-263.                                                                                               |
| 90 | Kant, Ravi, et al. "Genome sequence of "Pedosphaera parvula" Ellin514, an aerobic verrucomicrobial isolate from pasture soil." (2011): 2900-2901.                                                                                                                                                                              |
| 91 | Schlesner, Heinz. <i>The Prokaryotes: An Evolving Electronic Resource for the Microbiological Community: The Genus Verrucomicrobium</i> . 2004. Springer-Verlag New York, LLC.                                                                                                                                                 |
| 92 | Chin, Kuk-Jeong, Werner Liesack, and Peter H. Janssen. "Opitutus terrae gen. nov., sp. nov., to accommodate novel strains of the division Verrucomicrobia isolated from rice paddy soil." <i>International journal of systematic and evolutionary microbiology</i> 51.6 (2001): 1965-1968.                                     |
| 93 | Miroshnichenko, Margarita L., et al. "Caldithrix abyssi gen. nov., sp. nov., a nitrate-reducing, thermophilic, anaerobic bacterium isolated from a Mid-Atlantic Ridge hydrothermal vent, represents a novel bacterial lineage." <i>International journal of systematic and evolutionary microbiology</i> 53.1 (2003): 323-329. |
| 94 | Botero, Lina M., et al. "Thermobaculum terrenum gen. nov., sp. nov.: a non-phototrophic gram-positive thermophile representing an environmental clone group related to the Chloroflexi (green non-sulfur bacteria) and Thermomicrobia." <i>Archives of microbiology</i> 181.4 (2004): 269-277.                                 |

**Table S3:** Details of the data given to BayesTraits for the ancestral trait reconstruction. Trailing numbers after organism names are NCBI Taxonomy identifiers. In the reference column, the reference corresponding to the number can be found in Table S2. Peptidoglycan (PG): 0 = no PG, 1= thin PG, 2 = thick PG; membrane (MBN full): 0 = monoderm, 1 = diderm without lipopolysaccharides (LPS), 2 = diderm with LPS; spore: 0 = no spore, 1 = endospore, 2 = exospore, 3 = myxospore; membrane (MBN simple): 0 = monoderm, 1 = diderm.

| organism                        | phylum     | PG | MBN (full) | spore | MBN (simple) | ref   | taxonomic level of the information |
|---------------------------------|------------|----|------------|-------|--------------|-------|------------------------------------|
| Acetohalobium_arabaticum_574087 | Firmicutes | 1  | 2          | 1     | 1            | 59;60 | species                            |

|                                        |                     |   |    |   |   |          |         |
|----------------------------------------|---------------------|---|----|---|---|----------|---------|
| Acholeplasma_laidlawii_441768          | Tenericutes         | 0 | 0  | 0 | 0 | 87       | class   |
| Acidobacterium_capsulatum_240015       | Acidobacteria       | 1 | 12 | 0 | 1 | 3;4      | species |
| Acidothermus_cellulolyticus_351607     | Actinobacteria      | 2 | 0  | 0 | 0 | 9        | species |
| Arcobacter_nitrofigilis_572480         | Proteobacteria      | 1 | 12 | 0 | 1 | 79       | species |
| Bacillus_subtilis_1147161              | Firmicutes          | 2 | 0  | 1 | 0 | 50-53    | species |
| Caldilinea_aerophila_926550            | Chloroflexi         | 1 | 12 | 0 | 1 | 32       | species |
| Caldisericum_exile_511051              | Caldiserica         | 1 | 12 | 0 | 1 | 16       | species |
| Calditerrivibrio_nitroreducens_768670  | Deferribacteres     | 1 | 12 | 0 | 1 | 42       | species |
| Caldithrix_abyssi_880073               | undef               | 1 | 12 | 0 | 1 | 93       | species |
| Caulobacter_crescentus_190650          | Proteobacteria      | 1 | 12 | 0 | 1 | 80       | species |
| Chitinophaga_pinensis_485918           | Bacteroidetes       | 1 | 12 | 3 | 1 | 12       | species |
| Chlamydia_psittaci_1238235             | Chlamydiae          | 1 | 2  | 0 | 1 | 17-20;25 | species |
| Chlamydophila_pneumoniae_115711        | Chlamydiae          | 1 | 2  | 0 | 1 | 17-20    | phylum  |
| Chlorobaculum_parvum_517417            | Chlorobi            | 1 | 12 | 0 | 1 | 26       | phylum  |
| Chlorobium_chlorochromatii_340177      | Chlorobi            | 1 | 12 | 0 | 1 | 26;29    | species |
| Chlorobium_phaeovibrioides_290318      | Chlorobi            | 1 | 12 | 0 | 1 | 26;28    | species |
| Chloroherpeton_thalassium_517418       | Chlorobi            | 1 | 12 | 0 | 1 | 26;27    | species |
| Clostridium_amosum_445974              | Firmicutes          | 2 | 0  | 1 | 0 | 65       | species |
| Clostridium_saccharolyticum_610130     | Firmicutes          | 2 | 0  | 1 | 0 | 62;63    | species |
| Deferribacter_desulfuricans_639282     | Deferribacteres     | 1 | 12 | 0 | 1 | 41       | species |
| Deinococcus_deserti_546414             | Deinococcus-Thermus | 2 | 2  | 0 | 1 | 47       | species |
| Denitrovibrio_acetiphilus_522772       | Deferribacteres     | 1 | 12 | 0 | 1 | 40       | species |
| Desulfotomaculum_carboxydvorans_868595 | Firmicutes          | 2 | 0  | 1 | 0 | 54;55    | species |
| Desulfurispirillum_indicum_653733      | Chrysiogenetes      | 1 | 12 | 0 | 1 | 37       | species |
| Elusimicrobium_minutum_445932          | Elusimicrobia       | 1 | 12 | 0 | 1 | 48       | species |
| Escherichia_coli_574521                | Proteobacteria      | 1 | 2  | 0 | 1 | 76       | species |
| Fibrobacter_succinogenes_59374         | Fibrobacteres       | 1 | 12 | 0 | 1 | 49       | species |
| Flexistipes_sinusarabici_717231        | Deferribacteres     | 1 | 12 | 0 | 1 | 43       | species |



|                                       |                     |    |    |   |   |       |               |
|---------------------------------------|---------------------|----|----|---|---|-------|---------------|
| Fulvivirga_imtechensis_1237149        | Bacteroidetes       | 1  | 12 | 0 | 1 | 14    | species       |
| Gemmatimonas_aurantiaca_379066        | Gemmatimonadetes    | 1  | 12 | 0 | 1 | 66    | species       |
| Geobacter_bemidjiensis_404380         | Proteobacteria      | 1  | 12 | 0 | 1 | 73    | species       |
| Gloeobacter_violaceus_251221          | Cyanobacteria       | 1  | 2  | 0 | 1 | 38;39 | species       |
| Helicobacter_pylori_85963             | Proteobacteria      | 1  | 12 | 0 | 1 | 82    | species       |
| Heliobacterium_modesticaldum_498761   | Firmicutes          | 2  | 0  | 1 | 0 | 58    | species       |
| Herpetosiphon_aurantiacus_316274      | Chloroflexi         | 2  | 12 | 0 | 1 | 30;31 | species       |
| Holophaga_foetida_903818              | Acidobacteria       | 1  | 12 | 0 | 1 | 1;2   | species       |
| Ignavibacterium_album_945713          | Ignavibacteriae     | 1  | 12 | 0 | 1 | 68    | species       |
| Ktedonobacter_racemifer_485913        | Chloroflexi         | 2  | 0  | 2 | 0 | 33;34 | species       |
| Lentisphaera_araneosa_313628          | Lentisphaerae       | 1  | 12 | 0 | 1 | 69    | species       |
| Leptonema_illini_929563               | Spirochaetes        | 1  | 12 | 0 | 1 | 83    | species       |
| Leptospira_interrogans_189518         | Spirochaetes        | 1  | 2  | 0 | 1 | 84    | species       |
| Leptospira_meyeri_1218585             | Spirochaetes        | 1  | 2  | 0 | 1 | 86    | species       |
| Leptospirillum_ferrooxidans_1162668   | Nitrospirae         | 1  | 12 | 0 | 1 | 71    | species       |
| Magnetococcus_marinus_156889          | Proteobacteria      | 1  | 12 | 0 | 1 | 74    | species       |
| Marinithermus_hydrothermalis_869210   | Deinococcus-Thermus | 1  | 12 | 0 | 1 | 45    | species       |
| Melioribacter_roseus_1191523          | Ignavibacteriae     | 1  | 12 | 0 | 1 | 67    | species       |
| Mycoplasma_penetrans_272633           | Tenericutes         | 0  | 0  | 0 | 0 | 87    | class         |
| Neisseria_meningitidis_662598         | Proteobacteria      | 1  | 2  | 0 | 1 | 81    | species       |
| Nitrosomonas_sp._153948               | Proteobacteria      | 1  | 12 | 0 | 1 | 78    | species       |
| Oceanithermus_profundus_670487        | Deinococcus-Thermus | 1  | 12 | 0 | 1 | 44    | species       |
| Opiritaceae_bacterium_278956          | Verrucomicrobia     | 1  | 12 | 0 | 1 | 92    | other species |
| Opiritatus_terrae_452637              | Verrucomicrobia     | 1  | 12 | 0 | 1 | 92    | species       |
| Oscillatoriales_cyanobacterium_864702 | Cyanobacteria       | 2  | 2  | 0 | 1 | 38    | phylum        |
| Paenibacillus_polymyxa_886882         | Firmicutes          | 2  | 0  | 0 | 0 | 56    | species       |
| Paludibacter_propionisigenes_694427   | Bacteroidetes       | 1  | 12 | 0 | 1 | 15    | species       |
| Parachlamydia_acanthamoebae_765952    | Chlamydiae          | 12 | 2  | 0 | 1 | 17-23 | species       |
| Pedosphaera_parvula_320771            | Verrucomicrobia     | 1  | 12 | 0 | 1 | 90    | species       |

|                                         |                       |   |    |   |   |          |         |
|-----------------------------------------|-----------------------|---|----|---|---|----------|---------|
| Pelosinus_fermentans_1122947            | Firmicutes            | 1 | 12 | 1 | 1 | 57       | species |
| Planctomyces_brasiliensis_756272        | Planctomycetes        | 1 | 12 | 0 | 1 | 72       | phylum  |
| Planctomyces_maris_344747               | Planctomycetes        | 1 | 12 | 0 | 1 | 72       | phylum  |
| Prochlorococcus_marinus_167539          | Cyanobacteria         | 2 | 2  | 0 | 1 | 38       | phylum  |
| Propionibacterium_freudenreichii_754252 | Actinobacteria        | 2 | 0  | 0 | 0 | 10;11    | species |
| Rhodothermus_marinus_762570             | Bacteroidetes         | 1 | 12 | 0 | 1 | 13       | species |
| Rivularia_sp._373994                    | Cyanobacteria         | 2 | 2  | 0 | 1 | 38       | phylum  |
| Rubrobacter_xylanophilus_266117         | Actinobacteria        | 2 | 0  | 0 | 0 | 5;6      | species |
| Singulisphaera_acidiphila_886293        | Planctomycetes        | 1 | 12 | 0 | 1 | 72       | phylum  |
| Sorangium_cellulosum_448385             | Proteobacteria        | 1 | 1  | 0 | 1 | 77       | species |
| Spiroplasma_chrysopicola_1276227        | Tenericutes           | 0 | 0  | 0 | 0 | 87       | class   |
| Spiroplasma_melliferum_1129368          | Tenericutes           | 0 | 0  | 0 | 0 | 87       | class   |
| Staphylococcus_aureus_282458            | Firmicutes            | 2 | 0  | 0 | 0 | 64       | species |
| Streptomyces_coelicolor_100226          | Actinobacteria        | 2 | 0  | 2 | 0 | 7;8      | species |
| Thermobaculum_terrenum_525904           | undef                 | 2 | 0  | 0 | 0 | 94       | species |
| Thermodesulfatator_indicus_667014       | Thermodesulfobacteria | 1 | 12 | 0 | 1 | 88       | species |
| Thermodesulfobacterium_geofontis_795359 | Thermodesulfobacteria | 1 | 12 | 0 | 1 | 89       | species |
| Thermodesulfobium_narugense_747365      | Firmicutes            | 1 | 12 | 0 | 1 | 61       | species |
| Thermodesulfovibrio_yellowstonii_289376 | Nitrospirae           | 1 | 12 | 0 | 1 | 70       | species |
| Thermomicrobium_roseum_309801           | Chloroflexi           | 1 | 12 | 0 | 1 | 35;36    | species |
| Thermus_scotoductus_743525              | Deinococcus-Thermus   | 1 | 12 | 0 | 1 | 46       | species |
| Thiorhodospira_sibirica_765914          | Proteobacteria        | 1 | 12 | 0 | 1 | 75       | species |
| Turneriella_parva_869212                | Spirochaetes          | 1 | 12 | 0 | 1 | 85       | species |
| Verrucomicrobiae_bacterium_382464       | Verrucomicrobia       | 1 | 12 | 0 | 1 | 91       | species |
| Waddlia_chondrophila_716544             | Chlamydiae            | 1 | 12 | 0 | 1 | 17-20;24 | species |
| Xenococcus_sp._102125                   | Cyanobacteria         | 2 | 2  | 0 | 1 | 38       | phylum  |
| planctomycete_KSU-1_247490              | Planctomycetes        | 1 | 12 | 0 | 1 | 72       | phylum  |

**Table S4:** Number of POTRA domains predicted by InterProScan in the majority of the sequences composing each orthologous group (OG) identified as a member of the Omp85/TpsB family.

| OG            | # POTRA domains |
|---------------|-----------------|
| MCLdcw112505  | 1               |
| MCLdcw114962  | 1               |
| MCLdcw118160  | 1               |
| MCLdcw118847  | 1               |
| MCLdcw119966  | 1               |
| MCLdcw124459  | 1               |
| MCLdcw140106  | 1               |
| MCLdcw1107136 | 1-2             |
| MCLdcw112421  | 1-2             |
| MCLdcw117894  | 1-2             |
| MCLdcw143107  | 1-2             |
| MCLdcw148130  | 1-2             |
| MCLdcw112372  | 2               |
| MCLdcw114621  | 2               |
| MCLdcw1120017 | 2-3             |
| MCLdcw114035  | 2-3             |
| MCLdcw133029  | 2-3             |
| MCLdcw150224  | 2-3             |
| MCLdcw139371  | 2-4             |
| MCLdcw113131  | 3-4             |
| MCLdcw141083  | 3-4             |
| MCLdcw182166  | 3-5             |
| MCLdcw111272  | 4-5             |

**Table S5:** Results of the cross-validation procedure comparing four different models of sequence evolution available in PhyloBayes MPI.

| mean score +/-<br>stdev | CAT+GTR+ $\Gamma$      | CAT+ $\Gamma$         | GTR+ $\Gamma$         | LG+ $\Gamma$          |
|-------------------------|------------------------|-----------------------|-----------------------|-----------------------|
| CAT+GTR+ $\Gamma$       | /                      | 1279.9 +/-<br>116.634 | 8994.2 +/-<br>347.355 | 9317.5 +/-<br>358.479 |
| CAT+ $\Gamma$           | -1279.9 +/-<br>116.634 | /                     | 7714.3 +/-<br>391.3   | 8037.6 +/-<br>407.53  |
| GTR+ $\Gamma$           | -8994.2 +/-<br>347.355 | -7714.3 +/-<br>391.3  | /                     | 323.3 +/-<br>58.9441  |
| LG+ $\Gamma$            | -9317.5 +/-<br>358.479 | -8037.6 +/-<br>407.53 | -323.3 +/-<br>58.9441 | /                     |

**Table S6:** Possible roots for the bacterial domain reported in the phylogenomic literature since 2006. The “root” column corresponds to the group shared with our dataset that is the closest to the root in each source. G = Gamma; ML = maximum likelihood; JTT = Jones-Taylor-Thornton; BI = Bayesian inference; WAG = Whelan and Goldman; SPR = subtree prune-and-regraft; CAT = categories; GTR = Generalized time-reversible; LG = Le & Gascuel; R = free rate; F = Frequencies.

| source                                 | root                         | protein type       | # proteins    | # species | # AAs         | methods and models      |
|----------------------------------------|------------------------------|--------------------|---------------|-----------|---------------|-------------------------|
| Battistuzzi & Hedges 2009              | Deinococcus-Thermus          | rRNA               | not specified | 189       | 3786          | Felsenstein 84+G        |
| Battistuzzi & Hedges 2009              | Terrabacteria                | core protein       | 25            | 218       | 6884          | ML JTT+G<br>// BI JTT+G |
| Forterre 2015<br>(based on Woese 1990) | PVC                          | 16S rRNA           | 1             | 6         | Not specified | Jukes-Cantor 69         |
| Yutin et al. 2012                      | Proteobacteria               | ribosomal proteins | 50            | 995       | 6127          | ML WAG+G                |
| Whidden et al. 2014                    | Deferribacteres/Nitrospiraea | not specified      | 40,631        | 244       | N/A           | SPR                     |
| Raymann et al. 2015                    | Terrabacteria                | core proteins      | 46            | 134       | 10,986        | BI<br>CAT+GTR+          |





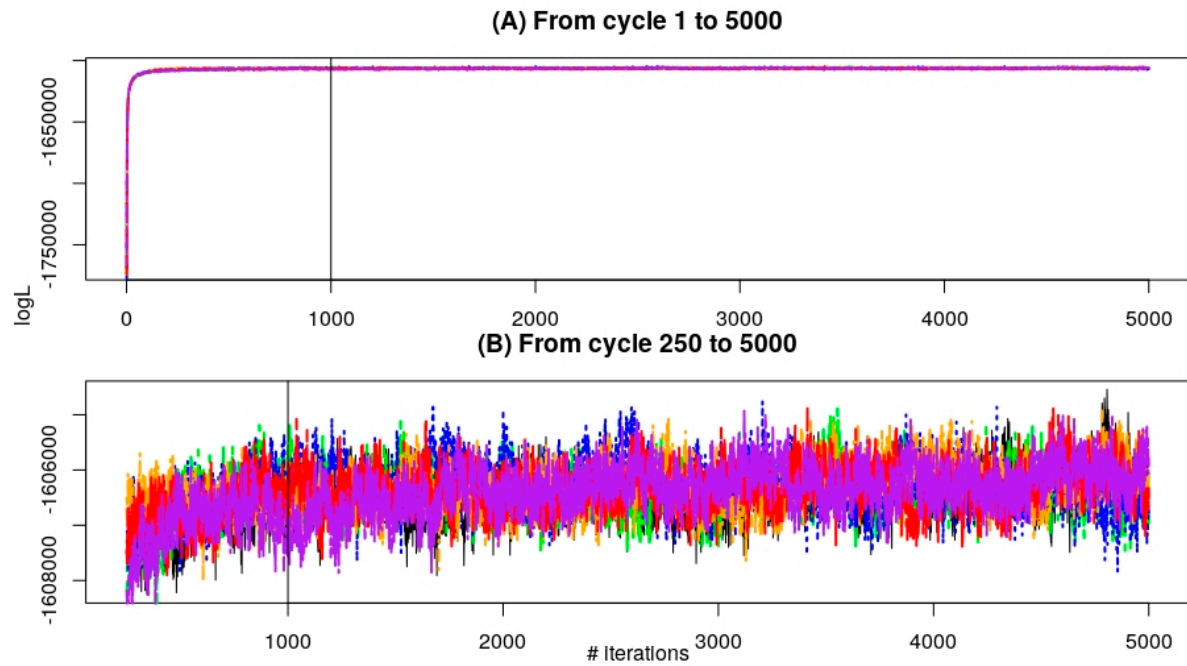

**Figure S3:** Evolution of the log likelihood of six PhyloBayes MCMC chains running under the CAT+GTR+ $\Gamma$  model of sequence evolution. The vertical line at cycle 1000 marks the end of the burnin. The supermatrix is the one of Figure S1.



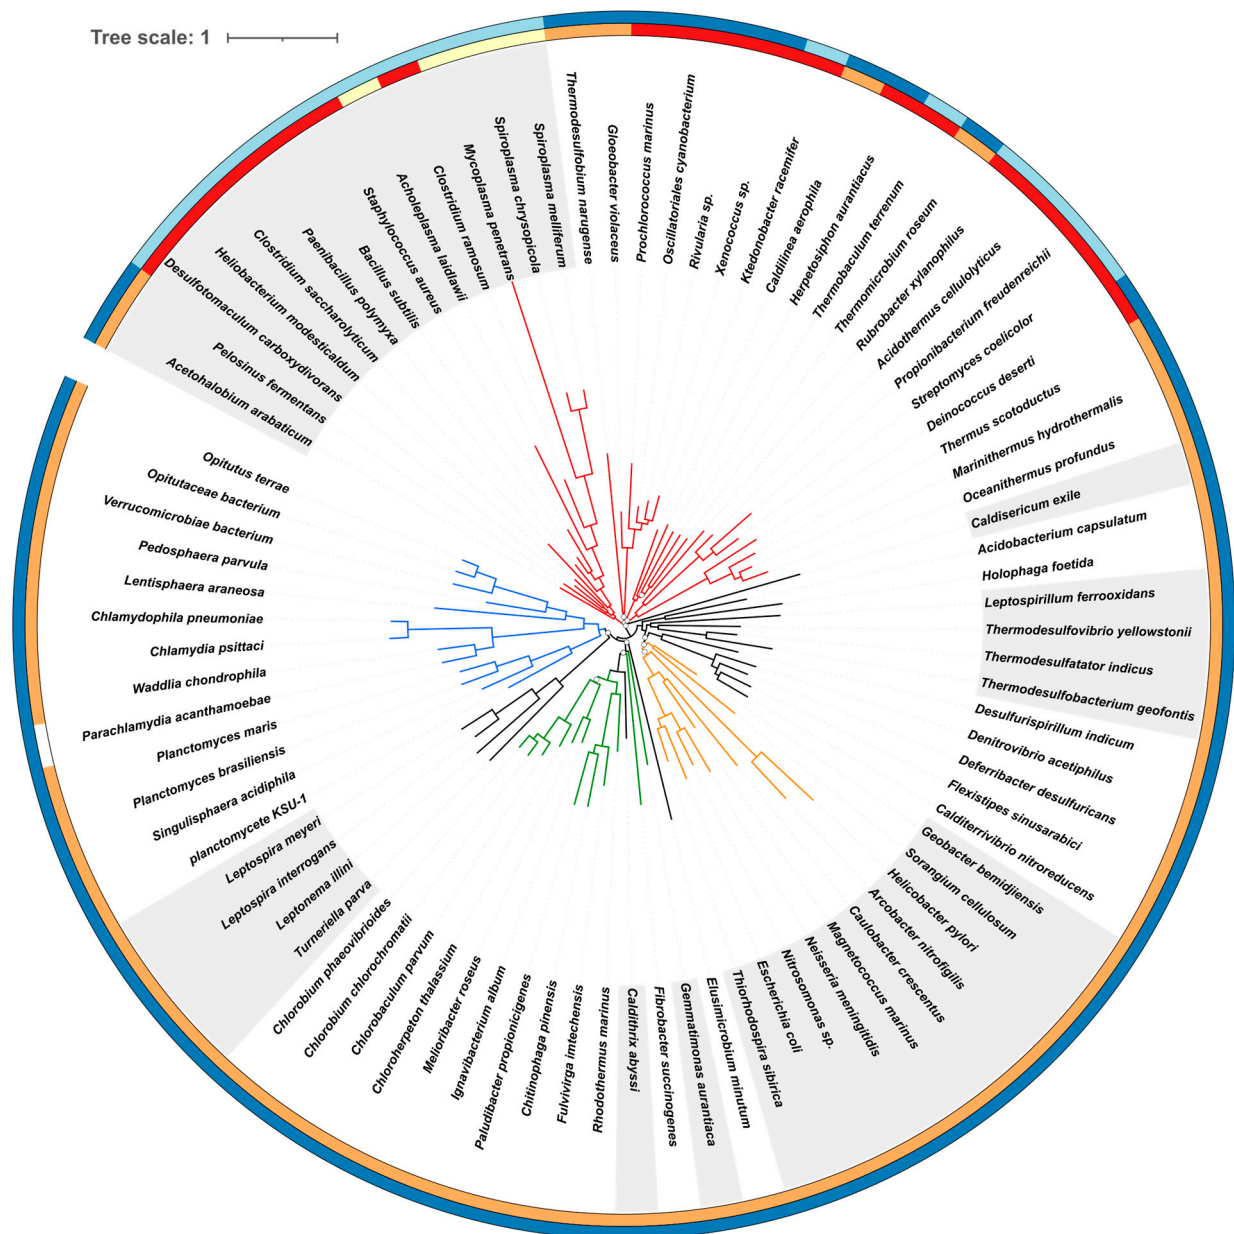

**Figure S4:** Phylogenomic tree of the bacterial domain based on a supermatrix concatenating 117 single-copy orthologous genes chosen for their broad conservation across Bacteria. This tree is the consensus of the six MCMC chains (A to F) shown in Figure S5. The tree is rooted on the Terrabacteria. Otherwise, it is equivalent to Figure S1. Color key is: red = Terrabacteria, orange = Proteobacteria, green = FBC superphylum, blue = PVC superphylum, black = other. Outer circles represent the status of the peptidoglycan (PG) and of the outer membrane in the organisms, according to our literature survey: red = thick PG, orange = thin PG, yellow = no PG, dark blue = diderm, light blue = monoderm, white = no information. Alternating white and gray backgrounds highlight the alternance between differentially colored groups or phyla.



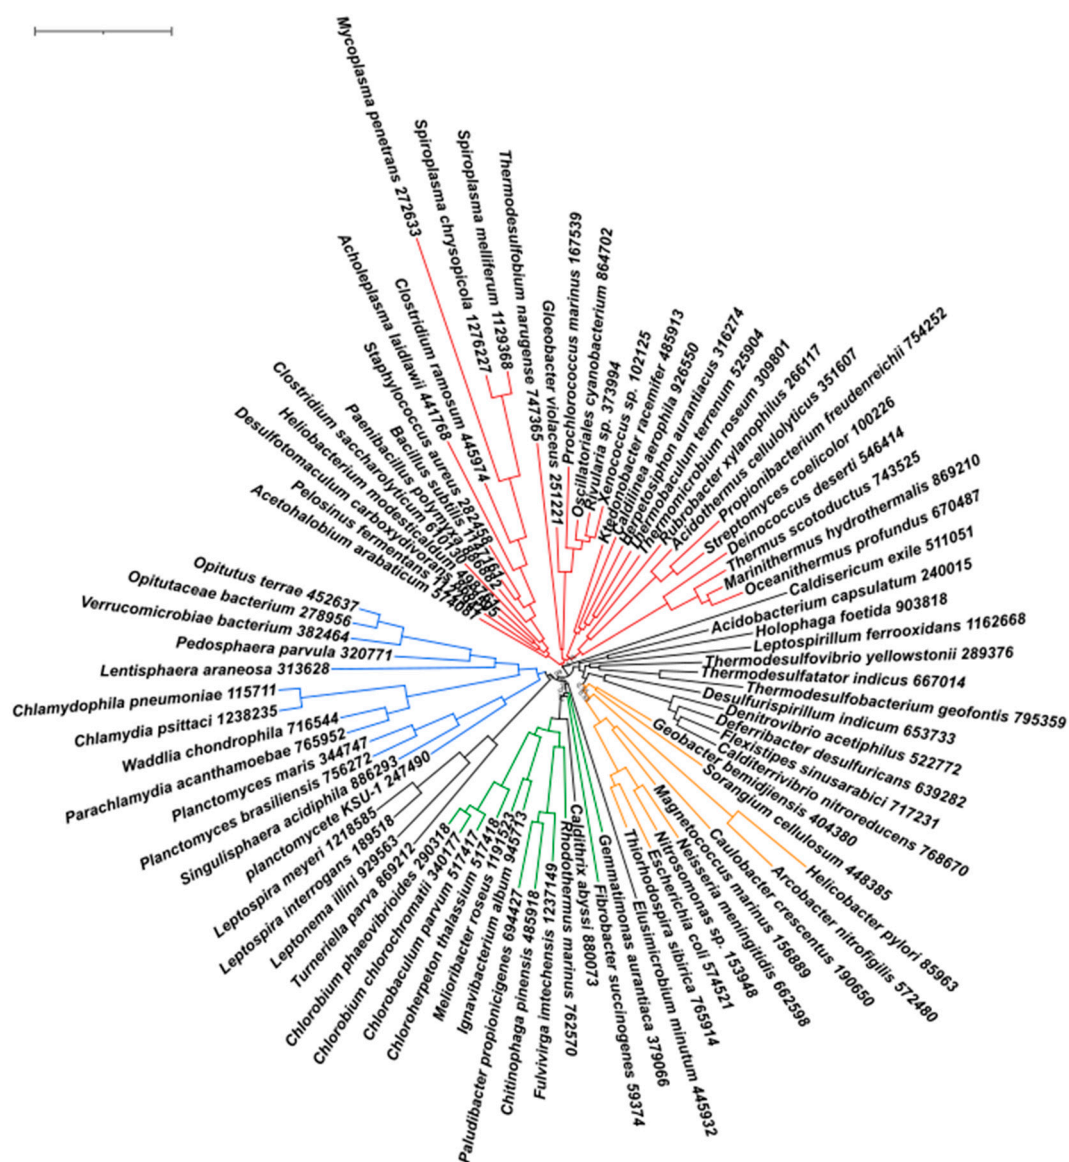

---

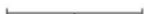

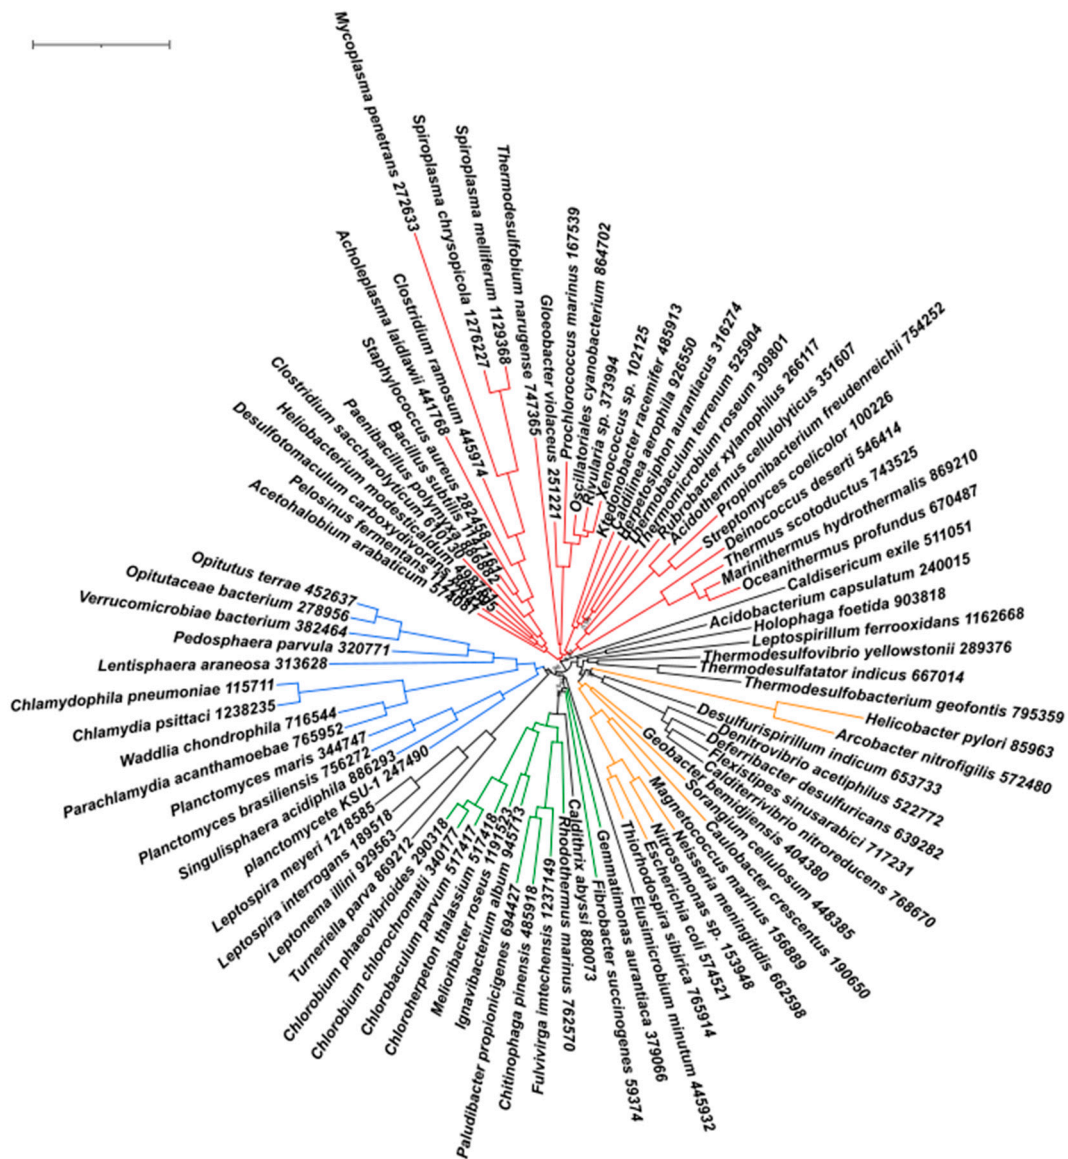

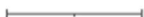



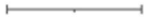

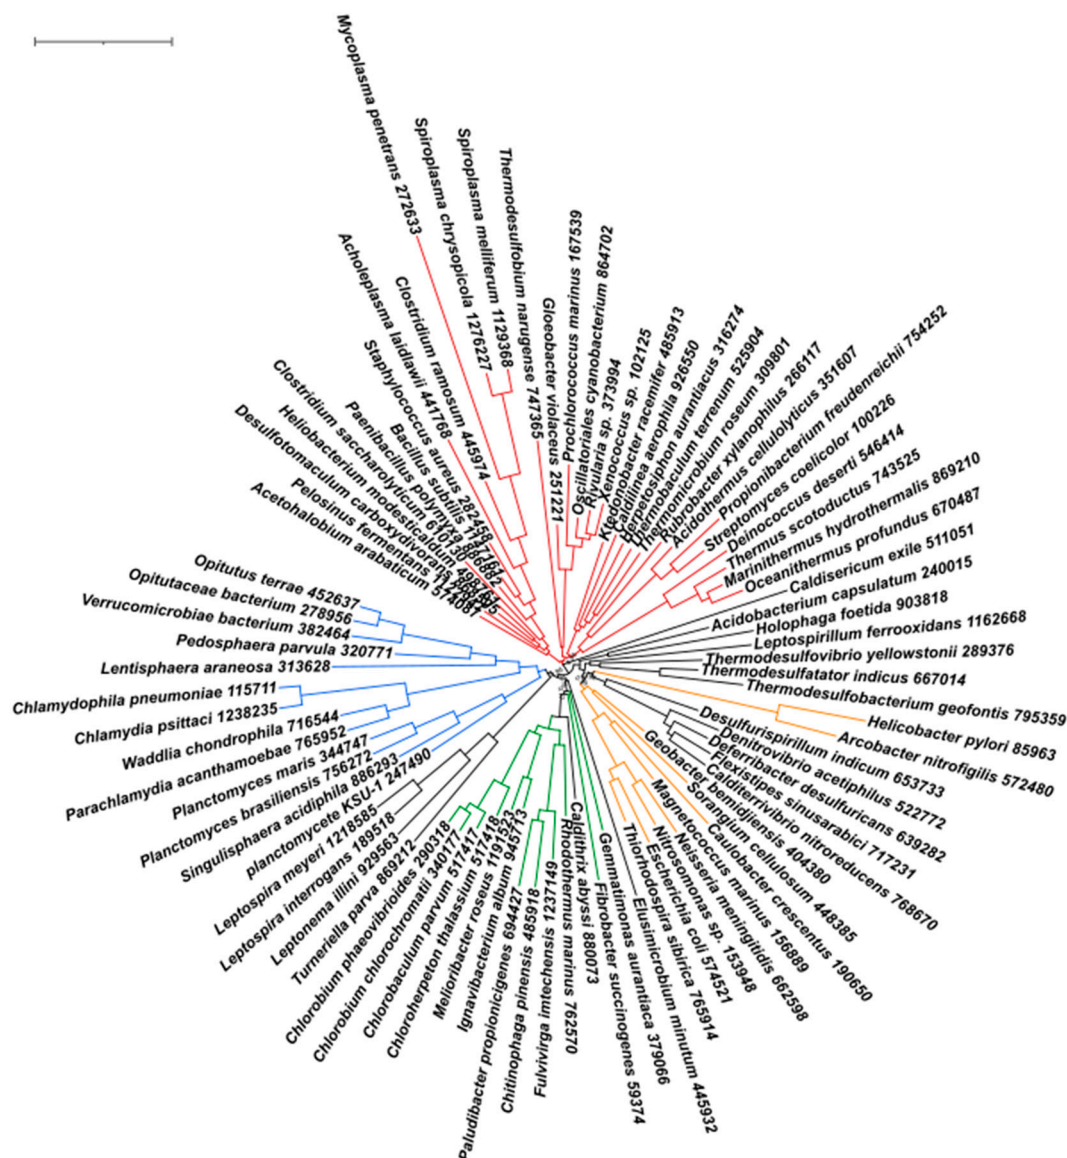

26



red = thick PG, orange = thin PG, yellow = no PG, dark blue = diderm, light blue = monoderm, white = no information. Alternating white and gray backgrounds highlight the alternance between differentially colored groups or phyla.

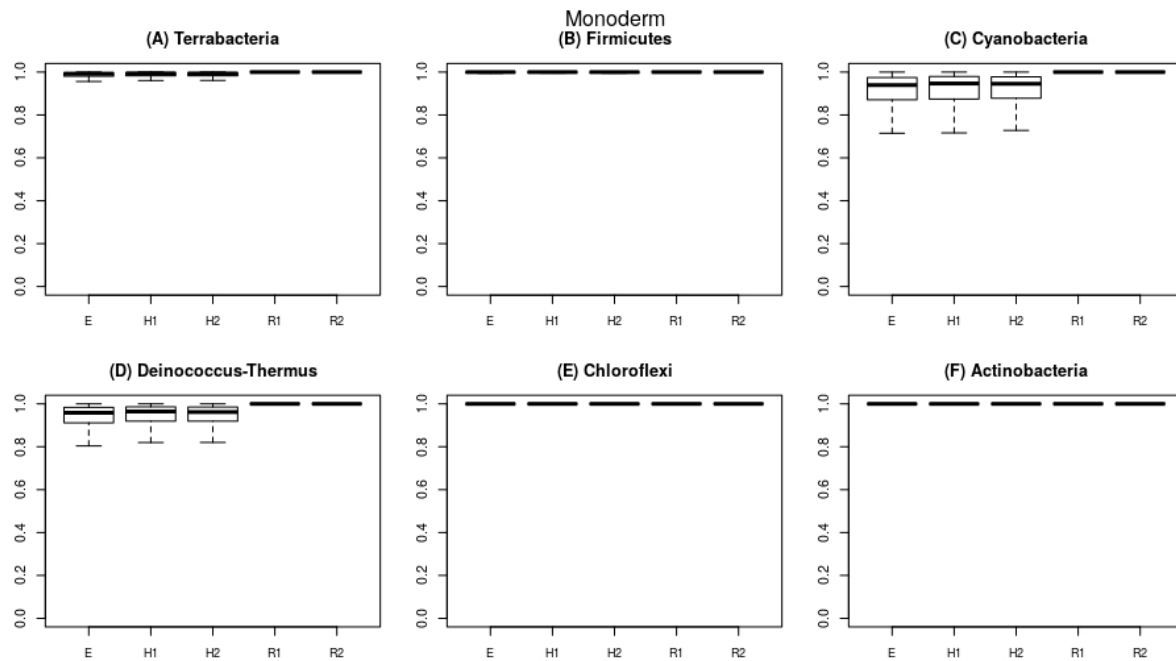

**Figure S7:** Posterior probabilities for a monoderm LBCA according to five different models, prior exponential of 10 (E), hyperprior exponential 0 to 10 (H1), hyperprior exponential 0 to 100 (H2), reverse jump hyperprior exponential 0 to 10 (R1) and reverse jump hyperprior exponential 0 to 100 (R2), and six possible roots for the bacterial domain (Terrabacteria, Firmicutes, Cyanobacteria, Deinococcus-Thermus, Chloroflexi and Actinobacteria).



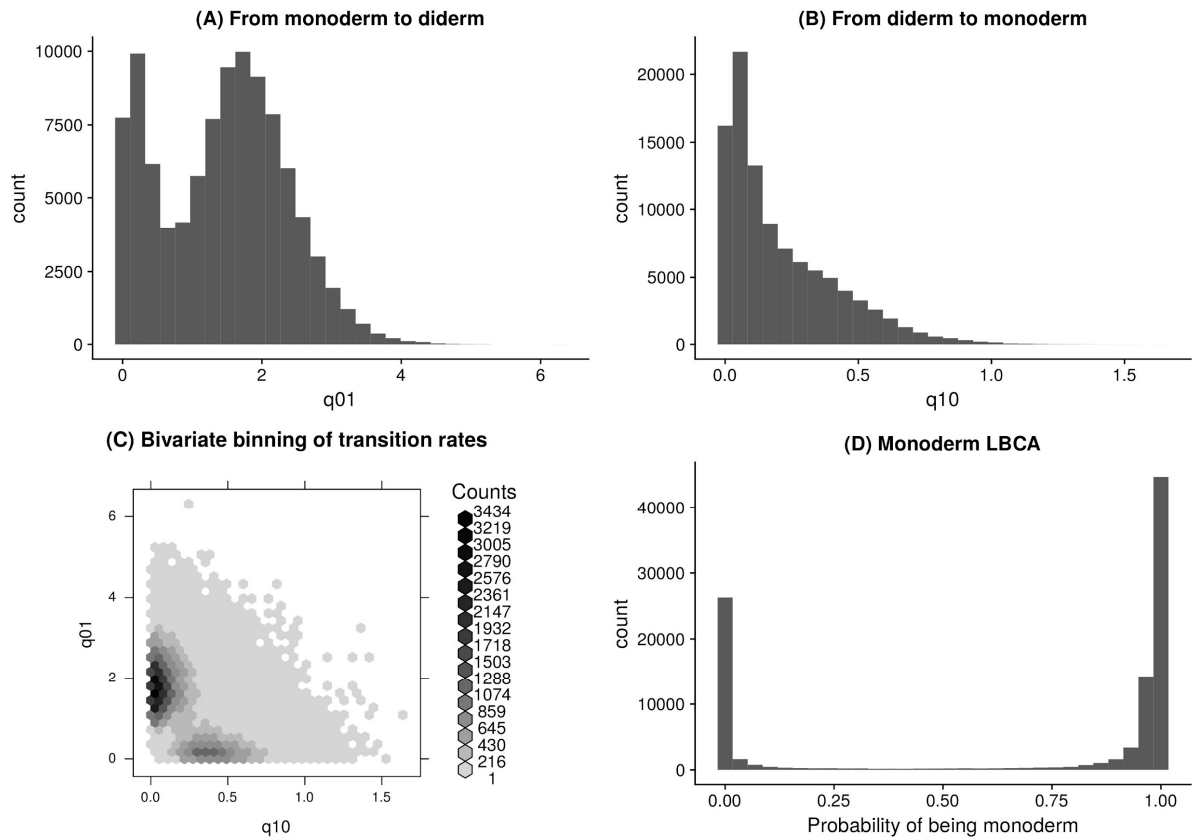

**Figure S8:** Posterior transition rates and posterior probability of being monoderm for the model where the hyper-prior was purposely biased towards the “diderm-first” hypothesis. “q01” is the transition rate from monoderm to diderm (limited) and “q10” is the transition rate from diderm to monoderm (favored). LBCA = Last Bacterial Common Ancestor.

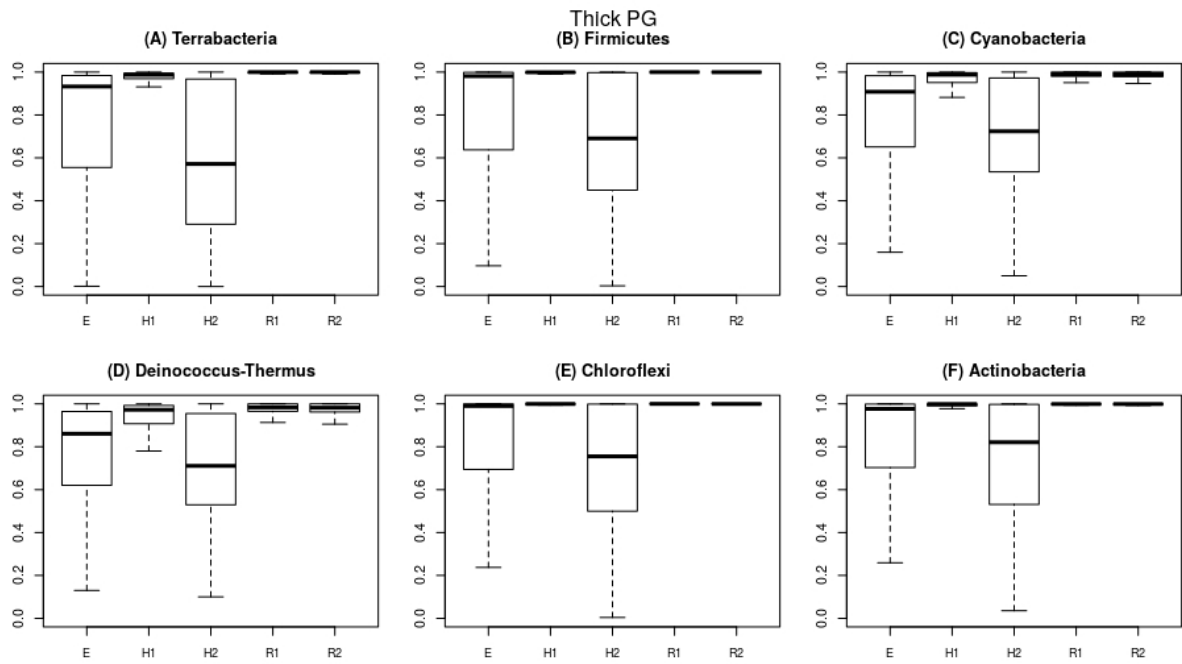

**Figure S9:** Posterior probabilities for a LBCA featuring a thick peptidoglycan (PG) layer according to the five different models and the six possible bacterial roots.

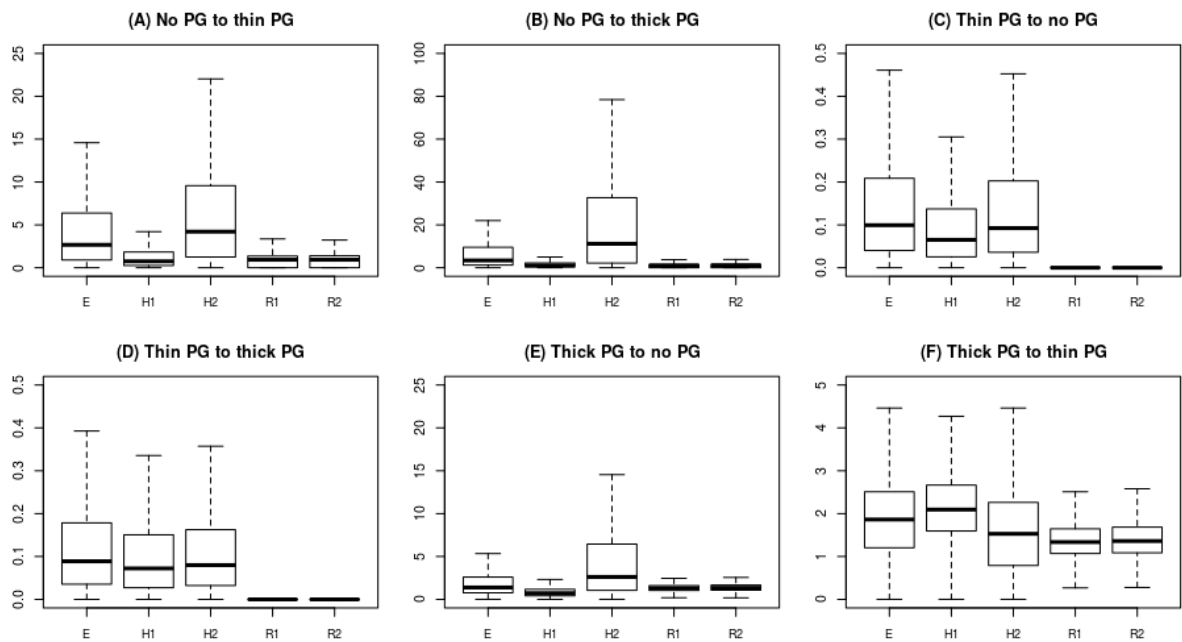

**Figure S10:** Posterior transition rates for the peptidoglycan (PG) trait. The Terrabacteria root was used for the five models.

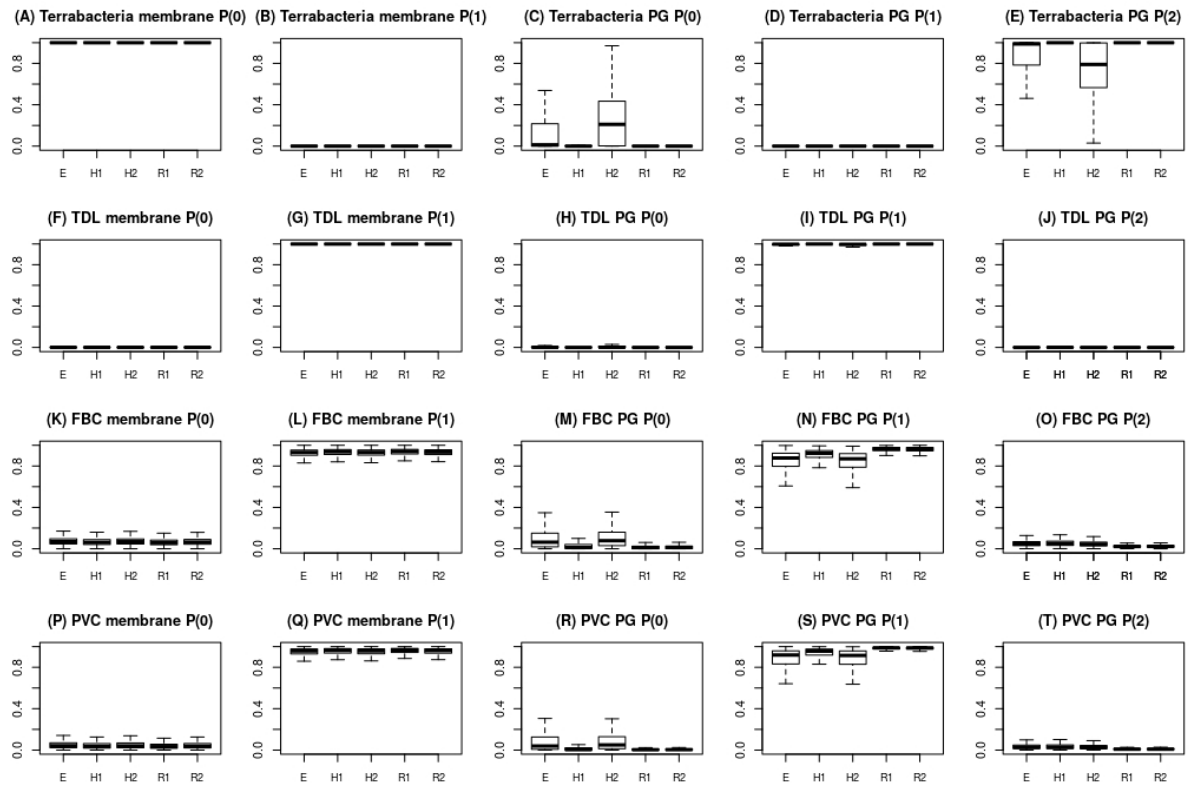

**Figure S11:** Posterior probabilities for the peptidoglycan (PG) and membrane traits in the LCA of four bacterial groups. Membrane P(0) and P(1) correspond to one and two membranes, respectively, PG P(0), P(1) and P(2) correspond to no PG, thin PG and thick PG, respectively. The Terrabacteria root was used for the five models.

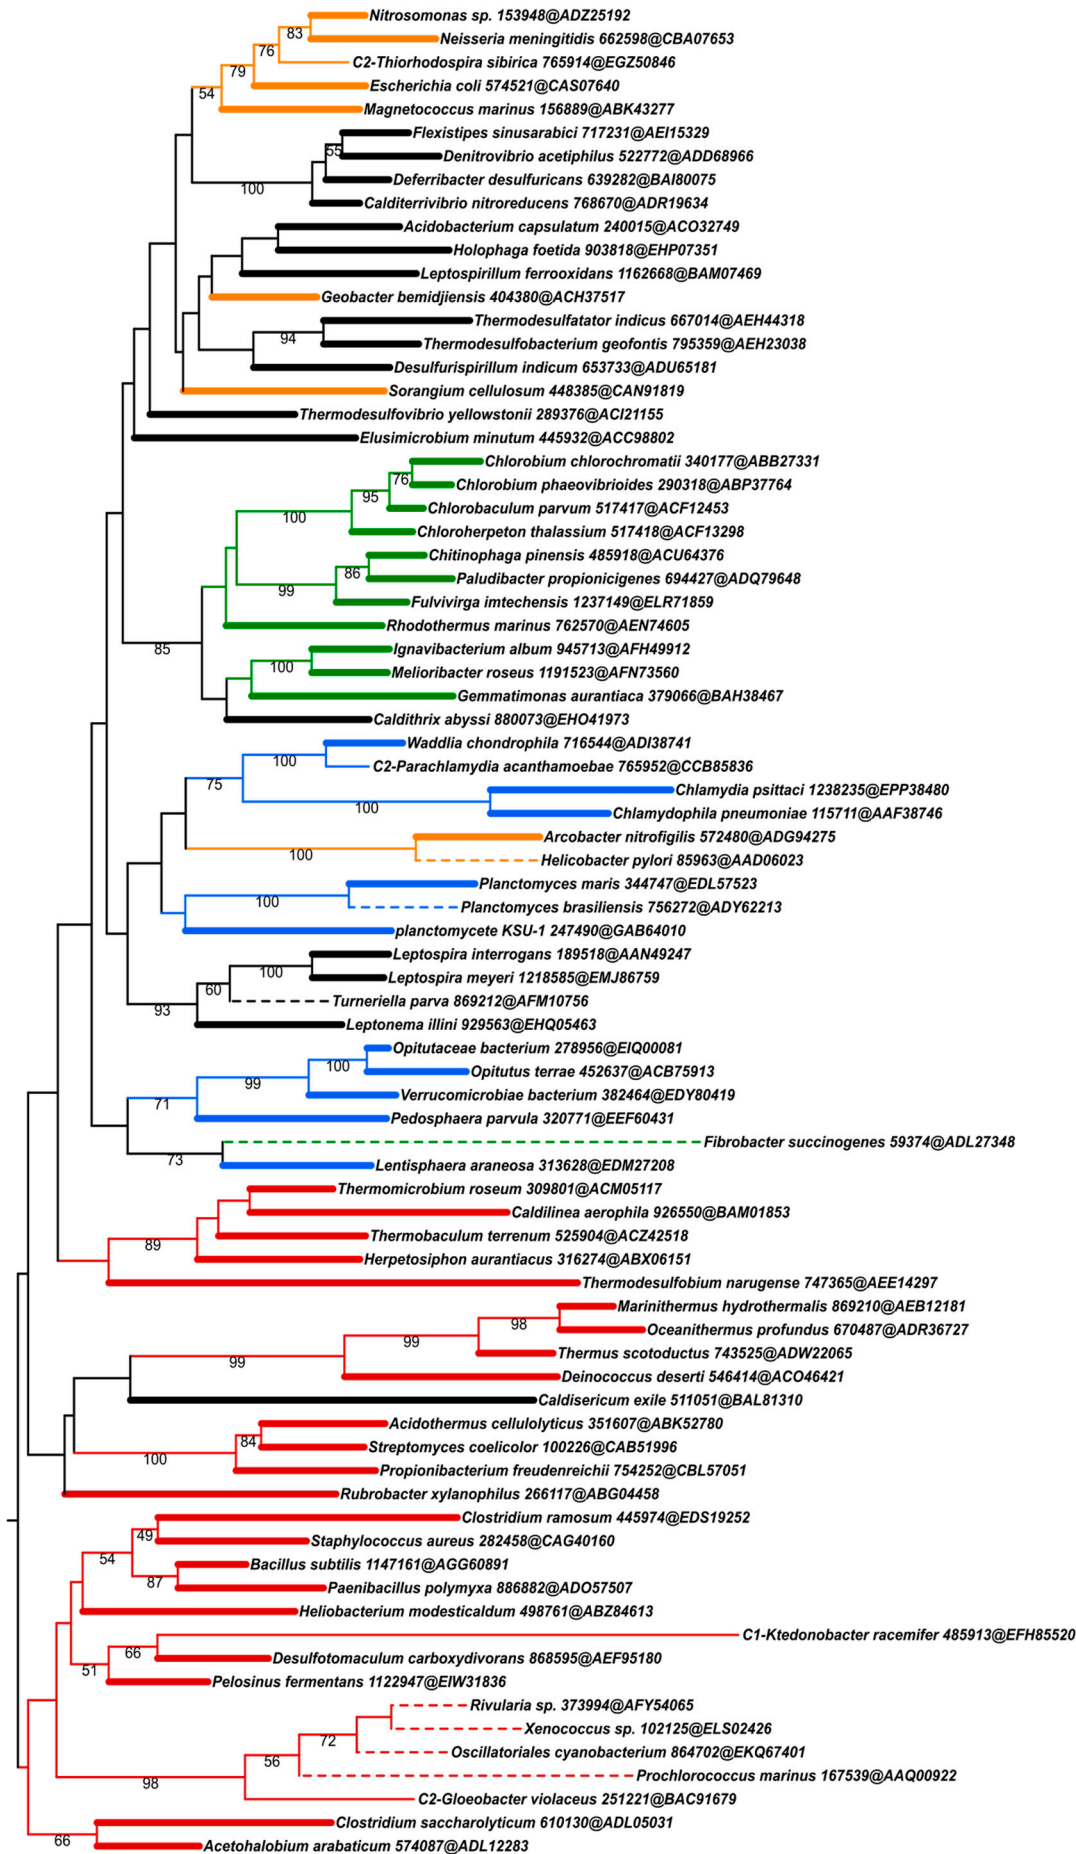



was used to run two MCMC chains under the CAT+ $\Gamma$  model for 50,000 cycles. Both chains were used to compute the consensus tree (maxdiff = 0.284; meandiff = 0.007). Color key is: red = Terrabacteria, orange = Proteobacteria, green = FBC superphylum, blue = PVC superphylum, black = other. Outer circles represent the status of the peptidoglycan (PG) and of the outer membrane in the organisms, according to our literature survey: red = thick PG, orange = thin PG, yellow = no PG, dark blue = diderm, light blue = monoderm, white = no information. Alternating white and gray backgrounds highlight the alternance between differentially colored groups or phyla.

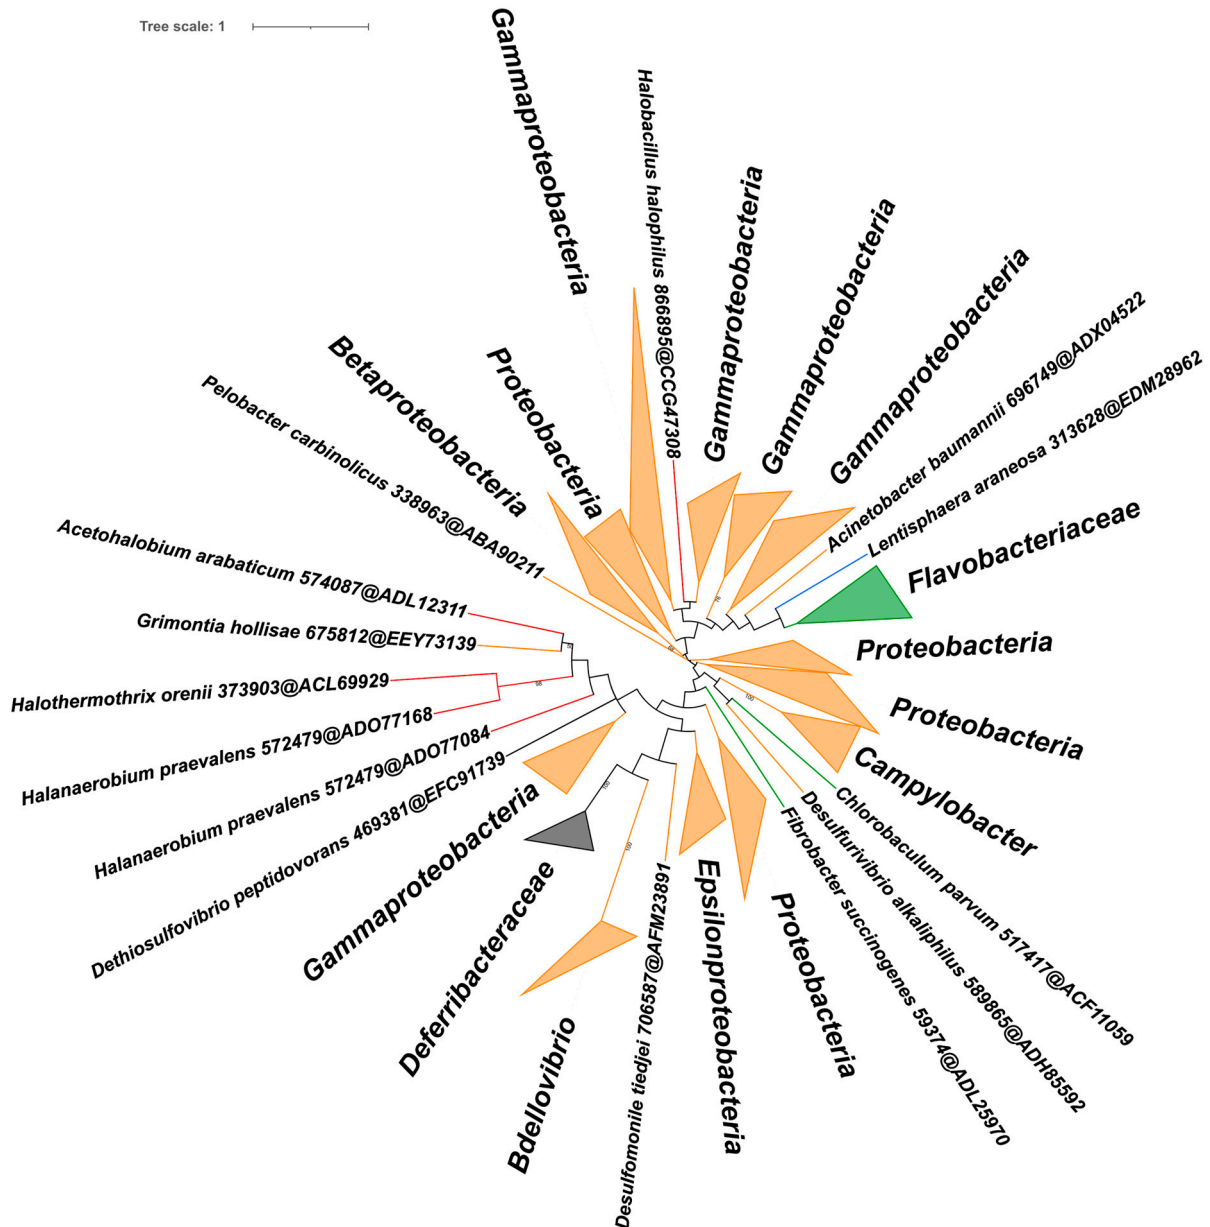

**Figure S14:** Unrooted ToIa tree inferred using RAXML under the LG+F+ $\Gamma$  model. Color key for branches (collapsed included) is: red = Terrabacteria, orange = Proteobacteria, green = FBC superphylum, blue = PVC superphylum, black = other.

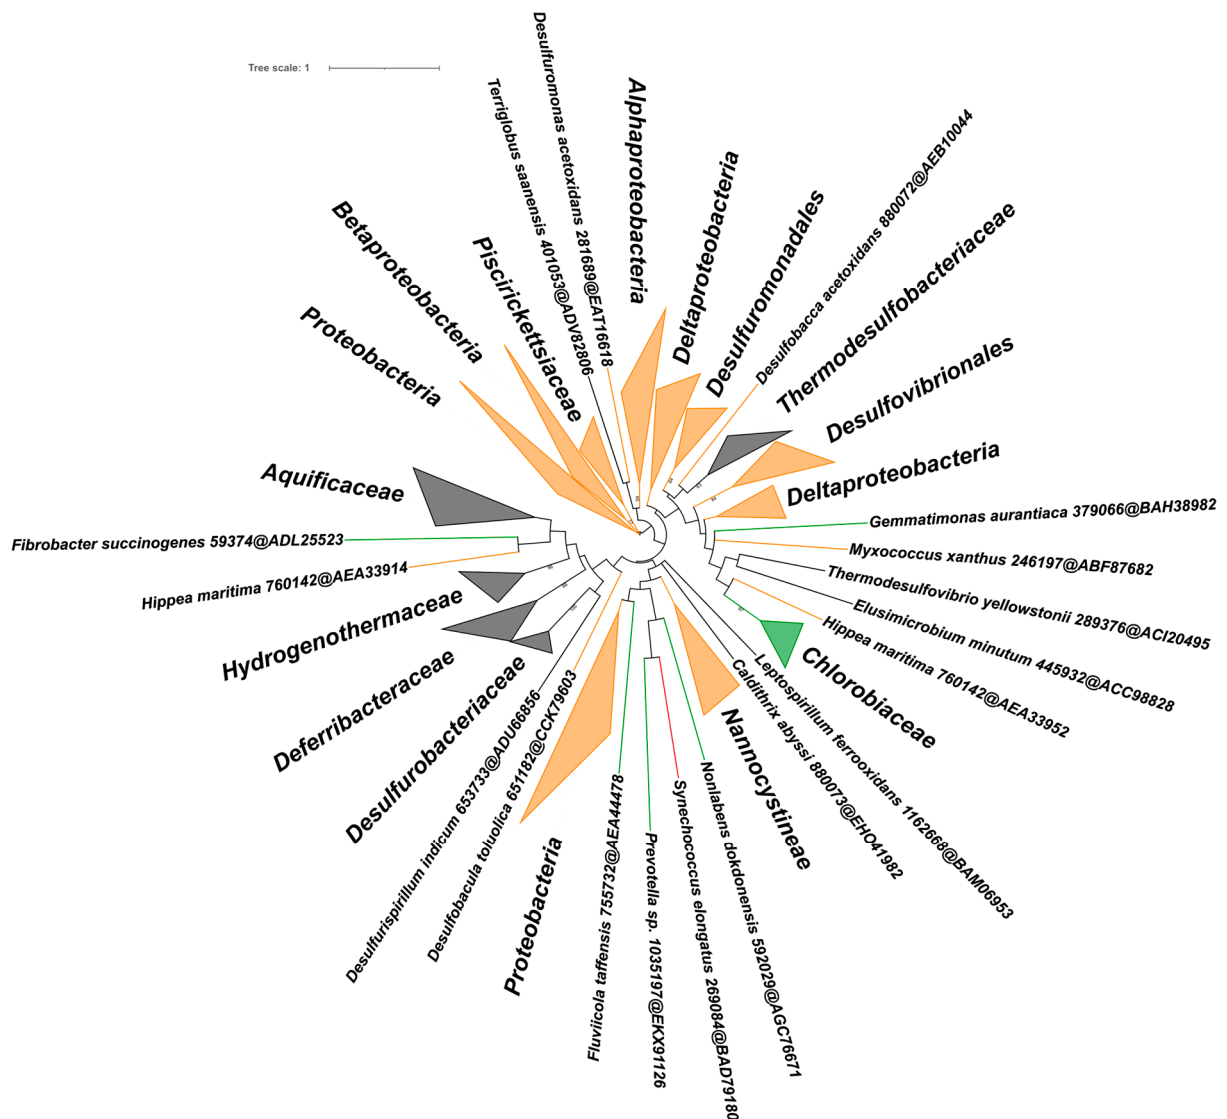

**Figure S15:** Unrooted YbgF tree inferred using RAxML under the LG+F+ $\Gamma$  model. Color key for branches (collapsed included) is: red = Terrabacteria, orange = Proteobacteria, green = FBC superphylum, blue = PVC superphylum, black = other.



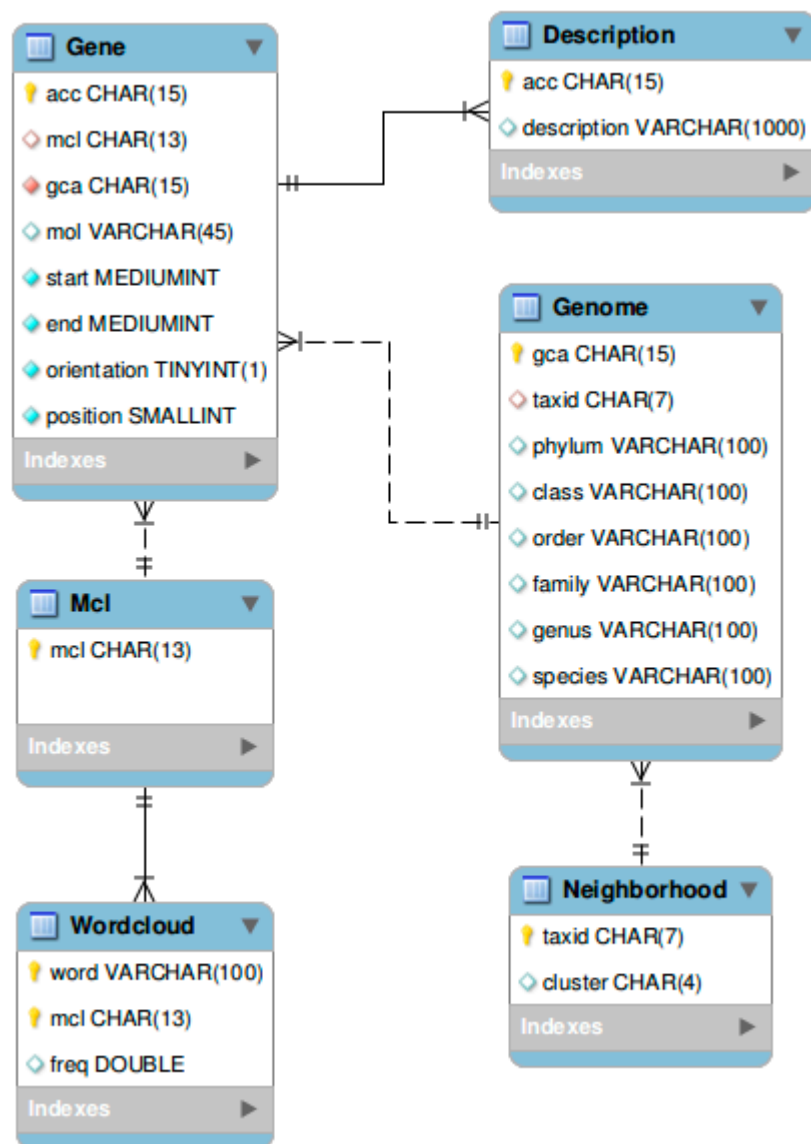

**Figure S16:** Schema of the MySQL database used by the synteny tool.
